# Supplementary material for: VSV-G-Enveloped Vesicles for Traceless Delivery of CRISPR-Cas9
Source: PubMed Central journal article supplement — Mol Ther Nucleic Acids. 2018 Jul 11;12:453–62. doi: 10.1016/j.omtn.2018.05.010 (PMC6041463; doi:10.1016/j.omtn.2018.05.010), 2018-07-11
Supplement: mmc1.pdf [file mmc1.pdf]

**OMTN, Volume 12**

## **Supplemental Information**

### **VSV-G-Enveloped Vesicles for Traceless**

#### **Delivery of CRISPR-Cas9**

**Claudia Montagna, Gianluca Petris, Antonio Casini, Giulia Maule, Gian Marco Franceschini, Ilaria Zanella, Luciano Conti, Francesca Arnoldi, Oscar R. Burrone, Lorena Zentilin, Serena Zacchigna, Mauro Giacca, and Anna Cerese**

# SUPPLEMENTARY MATERIALS

## FIGURES

### Figure S1

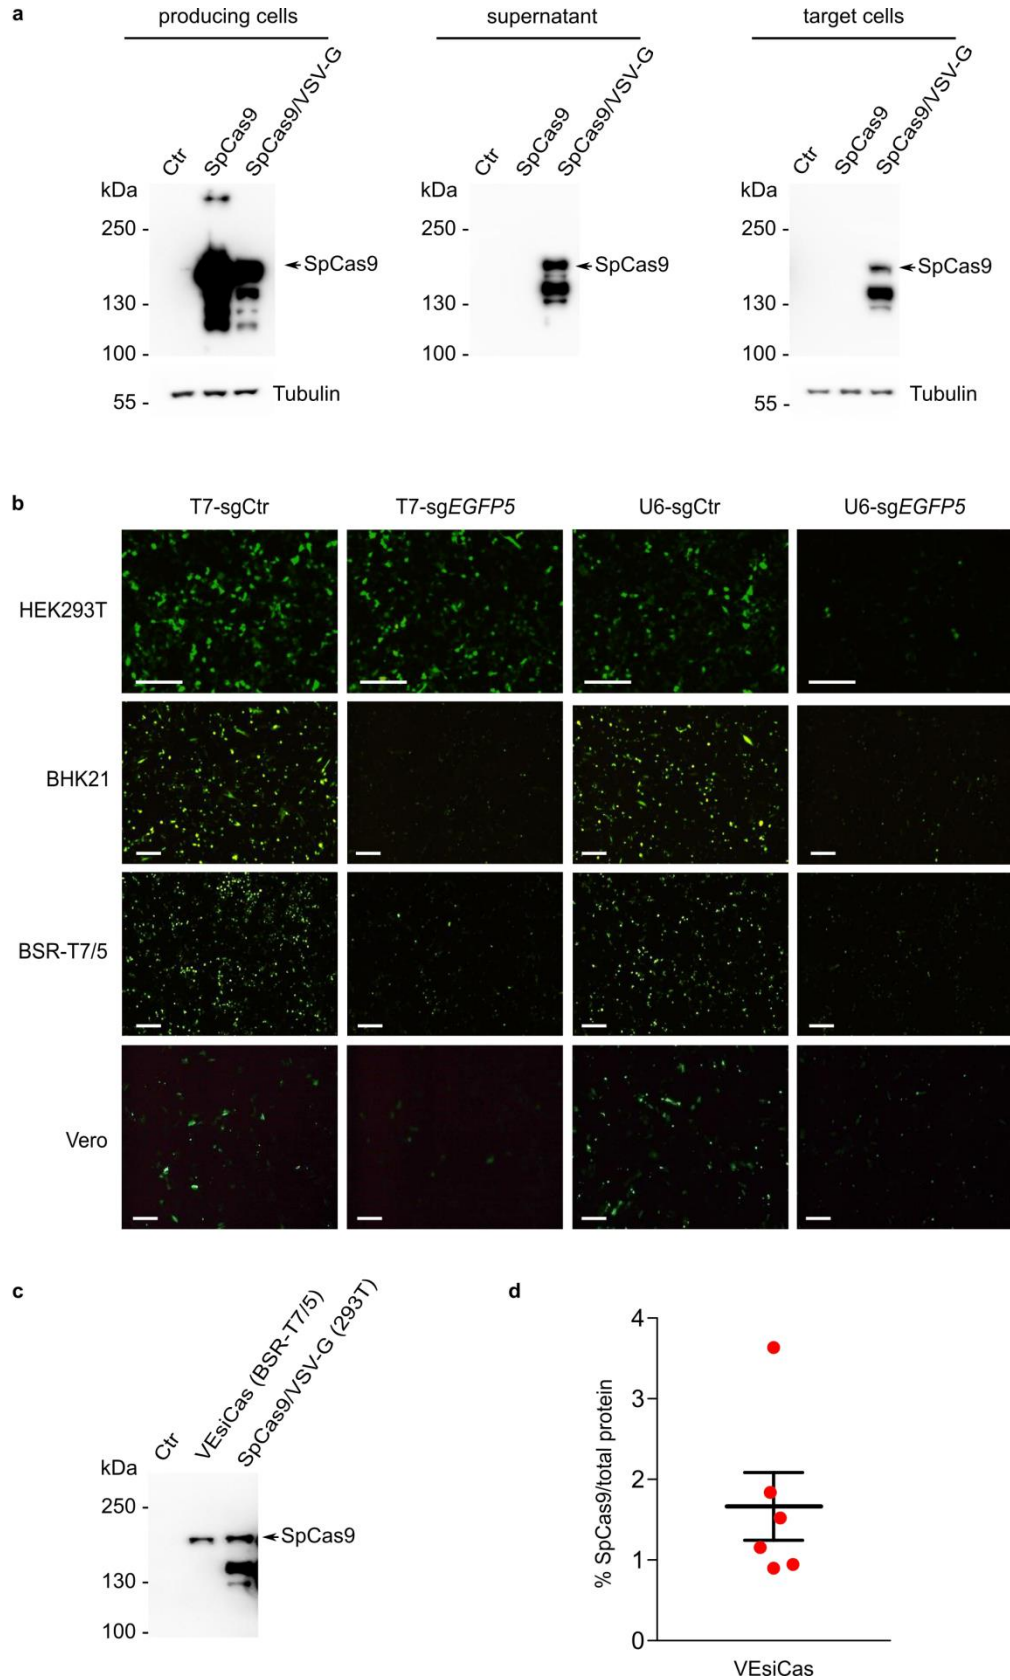

**Figure S1. Development of VSV-G Enveloped vesicles for SpCas9-sgRNA delivery.** (a) SpCas9/VSV-G vesicles production and delivery in HEK293T cells. Western blot analysis of SpCas9 expression in cell extracts of producing cells (left panel), in the supernatant of producing cells (middle panel) and in target cells 6 hours post transduction (right panel). Ctr corresponds to cells transfected with an empty control plasmid, SpCas9 corresponds to cells over-expressing SpCas9 and sgRNA (*sgEGFP5*), SpCas9/VSV-G corresponds to cells over-expressing SpCas9, *sgEGFP5* and VSV-G. Western blot is representative of n=2 independent experiments. (b) *EGFP* disruption assay in different cell lines using a U6 or T7 promoter sgRNA expression systems. Fluorescence microscopy images obtained from HEK293T, BHK21, BSR-T7/5 (a BHK21 clone stably expressing the T7 RNA polymerase) and Vero cell lines transfected with *EGFP* and SpCas9 expression plasmids together with plasmids expressing either *EGFP*-targeting (*sgEGFP5*) or non-targeting (*sgCtr*) sgRNAs from a U6 or a T7 promoter, as indicated. All cells but BSR-T7/5 were also co-transfected with a plasmid expressing the T7 RNA polymerase. *EGFP* knock-out was detected with variable intensity in all cell lines expressing sgRNAs (*sgEGFP5*) driven by the U6 promoter (right panels). Conversely, the sgRNA driven by the T7 RNA Polymerase system was able to induce *EGFP* knock-out only in permissive cells (BHK-21, BSR-T7/5 and Vero cells) but not in HEK293T cells. Scale bar: 100  $\mu$ m. Data are representative of n=2 independent experiments. (c) Western blot analysis of SpCas9 detected in the supernatant of BSR-T7/5 (VEsiCas) or HEK293T producing cells (SpCas9/VSV-G). The gel was loaded with similar amounts of SpCas9 protein. Western blots were developed with anti-SpCas9 or anti-tubulin antibodies. Western blot is representative of n=2 independent experiments. (d) Efficiency of SpCas9 incorporation into VEsiCas. The dot plot shows the percentage of SpCas9 protein over the total amount of protein content in VEsiCas (mean  $\pm$  s.e.m. of n=6 independent experiments).

**Figure S2**

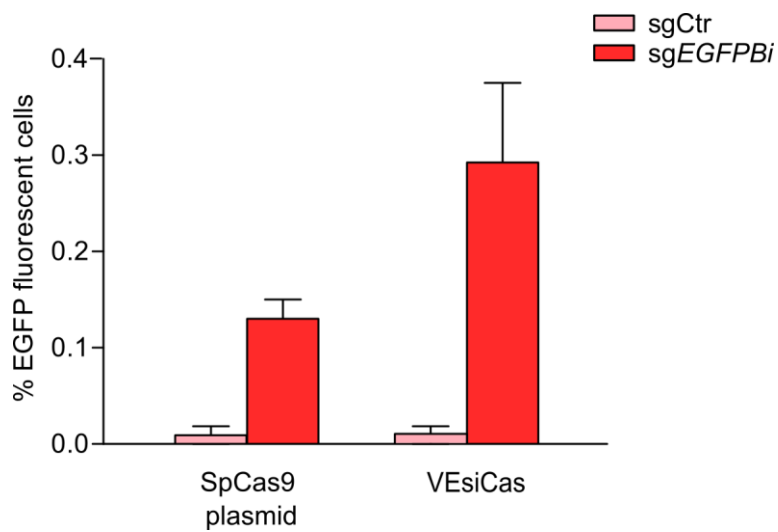

**Figure S2. Gene substitution of EGFP-Y66S gene mediated by VEsCas through homology-directed repair (HDR).** Percentage of fluorescent 293-iY66S cells obtained after transfection with a donor DNA plasmid (carrying a non-fluorescent fragment of wt-EGFP) and SpCas9-sgRNA delivery through either plasmid co-transfection or VEsCas transduction. HDR efficiencies using targeting (*EGFPBi*) or non-targeting (Ctr) sgRNAs are indicated. Data presented as mean  $\pm$  s.e.m. for n=2 independent experiments.

**Figure S3**

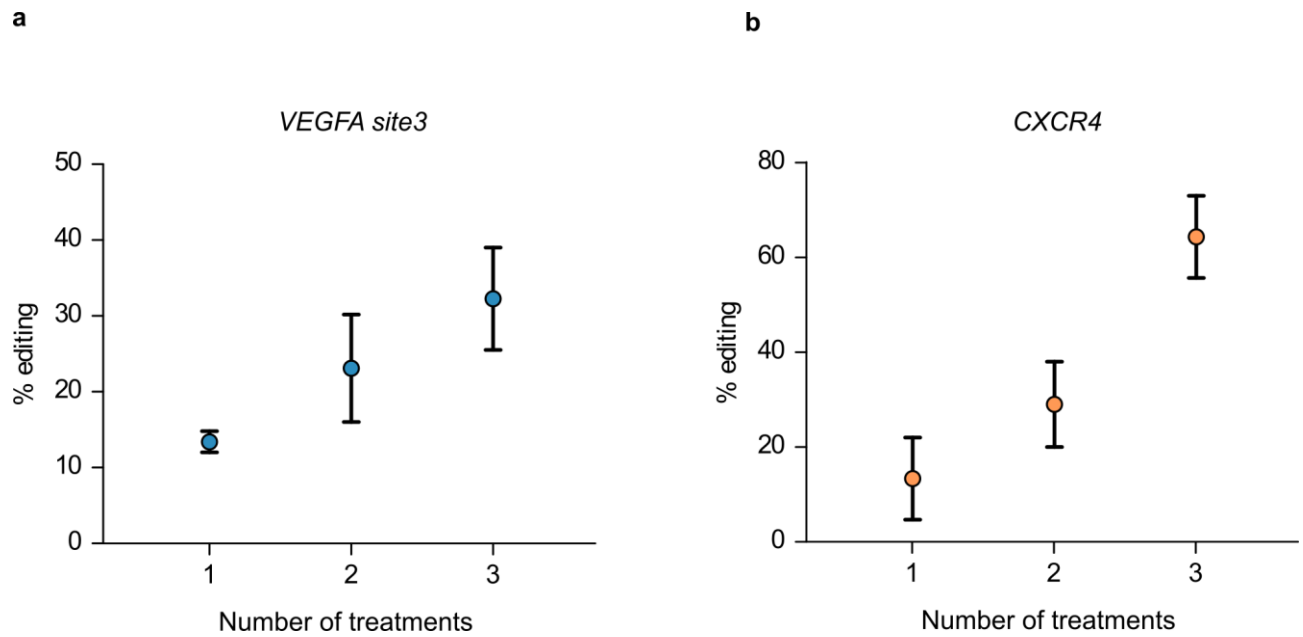

**Figure S3. Editing activity by VESiCas after multiple treatments.** (a) *VEGFA site3* and (b) *CXCR4* loci edited by VESiCas delivering SpCas9/sgRNA complexes in HEK293 cells after the indicated number of treatments performed at 48 hours distance. The percentage of indels was analyzed by TIDE. Data presented as mean  $\pm$  s.e.m. for n=3 independent experiments.

**Figure S4**

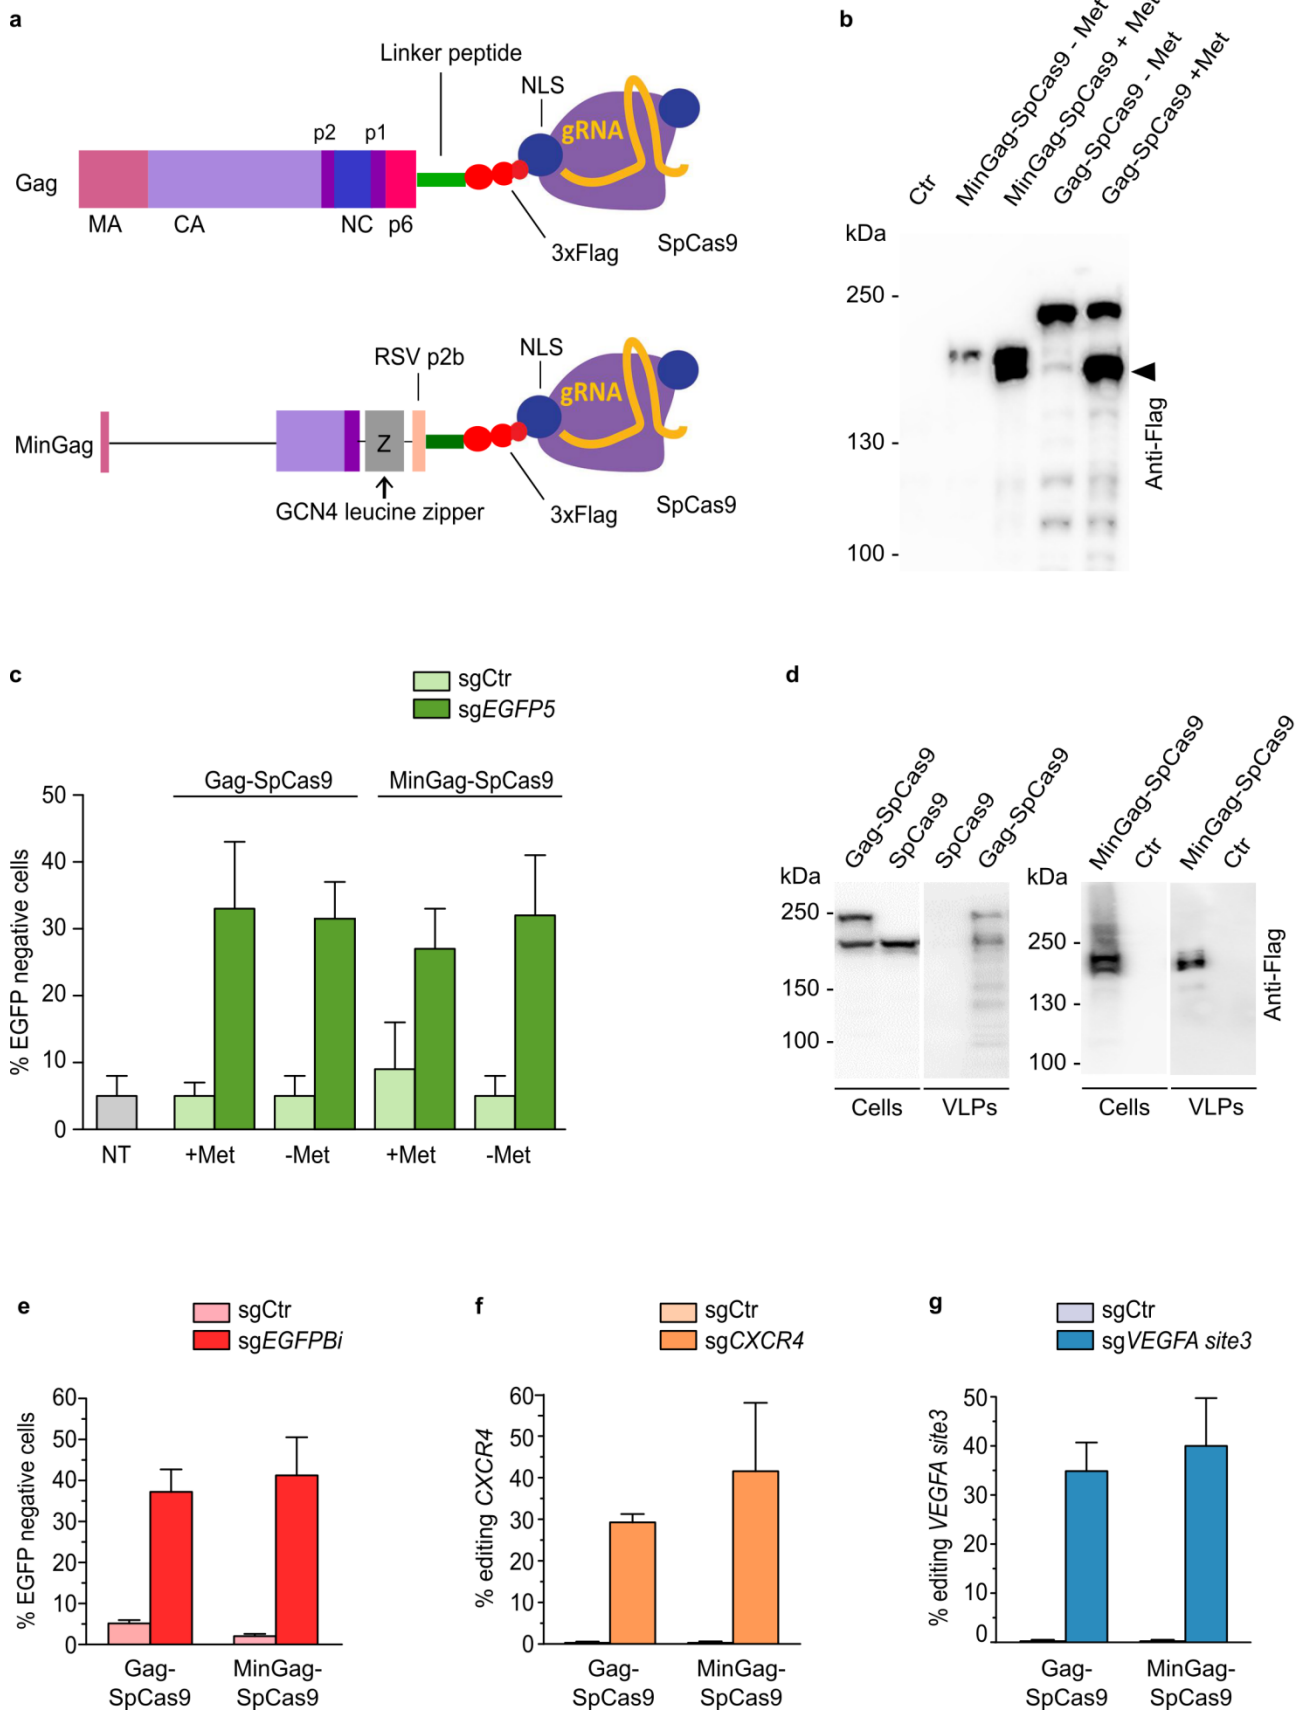

**Figure S4. Lentiviral-based viral-like particles (lenti-VLPs) for SpCas9 delivery.** (a) Scheme of the Gag-SpCas9 and MinimalGag-SpCas9 (MinGag-SpCas9) chimeras. The domains of Gag, Matrix (MA), Capsid (CA), Nucleocapsid (NC) and peptides p1, p2 and p6, are indicated. A linker peptide separates Gag from SpCas9. The position of the nuclear localization signals (NLS) and the 3xFLAG-tag are indicated. MinGag-SpCas9 fusion includes the N-terminal myristoylation signal of MA, the C-terminal part of CA and the p2 peptide. The NC was substituted with the GCN4 leucine zipper domain (Z) to maintain particle assembly. The RSV p2b peptide substitutes p6 for particle formation. (b) Western blot analysis of Gag-SpCas9 and MinGag-SpCas9. Cells were transfected with plasmid encoding Gag-SpCas9 and MinGag-SpCas9 either containing (+Met) or not (-Met) a methionine between the FLAG and the linker peptide. The arrowhead indicates free SpCas9 probably generated by translation starting from the internal Met. Ctr corresponds to cells transfected with an empty control plasmid. Western blot is representative of n=2 independent experiments. (c) Activity of Gag-SpCas9 and MinGag-SpCas9 chimeras in *EGFP* disruption assay. HEK293-EGFP cells were transfected with plasmids expressing Gag-SpCas9 or MinGag-SpCas9 with or without the methionine between the FLAG and the linker peptide. Cells were also co-transfected with *sgEGFP5* or *sgCtr*. NT = not treated. Data presented as mean  $\pm$  s.e.m. for n=2 independent experiments. (d) Western blot analysis of producing cells (Cells) and derived supernatants (VLPs) after overexpression of SpCas9, Gag-SpCas9 or MinGag-SpCas9 as indicated. Ctr corresponds to cells transfected with an empty control plasmid. Western blot is representative of n=2 independent experiments. (e-g) Genome editing with lenti-VLPs. Editing activity induced by VSV-G-decorated Gag-SpCas9 or MinGag-SpCas9 lenti-VLPs towards (e) the EGFP (percentage of EGFP negative cells), (f) the *CXCR4* or (g) the *VEGFA site3* loci in HEK293T cells. The percentage of indels was analyzed by TIDE. Data presented as mean  $\pm$  s.e.m. for n=2 independent experiments.

**Figure S5**

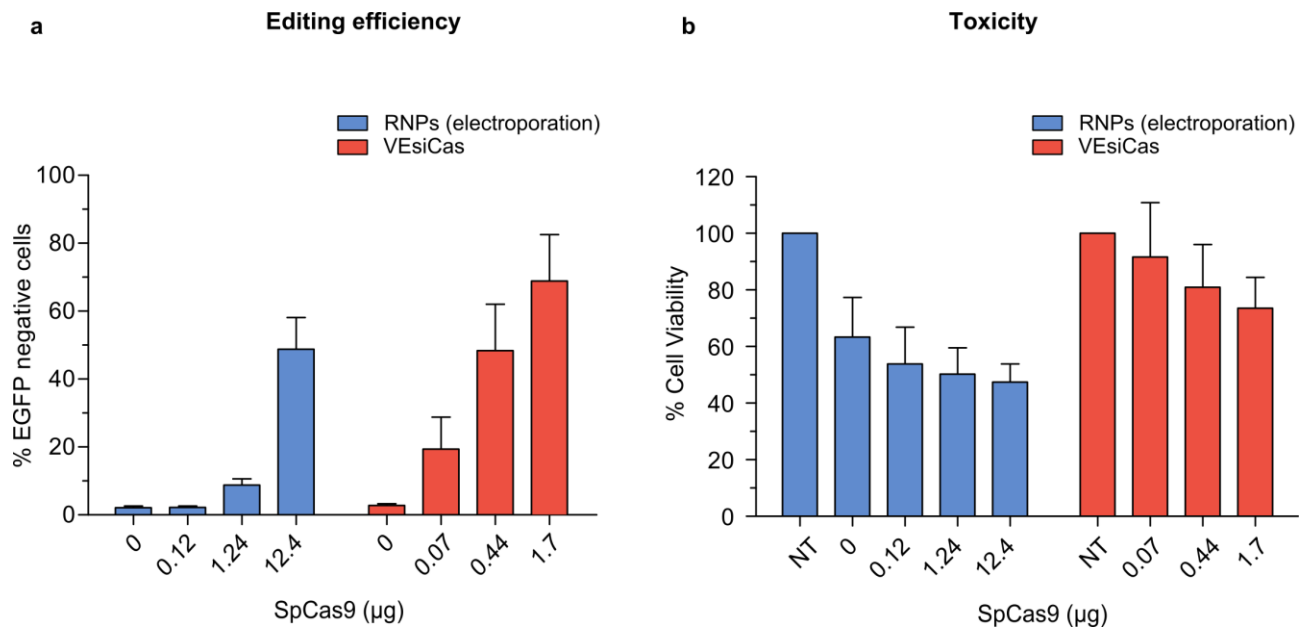

**Figure S5. Comparative analysis of editing efficiency and cell toxicity obtained with VEsiCas and SpCas9-sgRNA RNPs electroporation.** (a) *EGFP* disruption assay in HEK293-EGFP cells treated with scalar amounts of SpCas9 delivered through VEsiCas or RNPs electroporation. Both RNPs and VEsiCas were loaded with the same sgRNA (*sgEGFPB1*) transcribed by T7 RNA Polymerase either *in vitro* or in BSR-T7/5 cells respectively. (b) Toxicity of VEsiCas compared to RNPs delivered by electroporation. The bar graph shows the percentage of cell viability normalized to untreated cells (NT) 48 hours following delivery different amount of SpCas9 by electroporation or VEsiCas. Data reported as mean  $\pm$  s.e.m. of n=3 independent experiments.



**Figure S6**

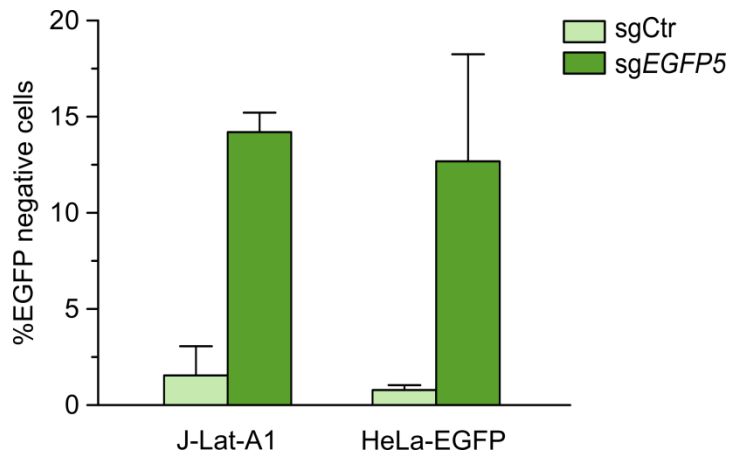

**Figure S6. VEsCas mediated *EGFP* knock-out in J-Lat-A1 and HeLa cells using VEsCas.**

J-Lat-A1 and HeLa stably expressing EGFP were treated with VEsCas carrying *EGFP* targeting (sg*EGFP5*) or control (sgCtrl) sgRNAs. The graph reports the percentages of non-fluorescent cells seven days following treatment (mean  $\pm$  s.e.m. of n=2 independent experiments).

## SEQUENCES

### pVAX-T7-sgRNA sequence

GGTACCTAATACGACTCACTATAGGAGACGGATTGACGTCTCTGTTTAAGAGCTATGCTGGAAACA  
GCATAGCAAGTTTAAATAAGGCTAGTCCGTTATCAACTTGAAAAAGTGGCACCGAGTCGGTGCT  
**TGGGTCGGCATGGCATCTCCACCTCCTCGCGGTCCGACCTGGGCATCCGAAGGAGGACGTCGTCCACTCG**  
**GATGGCTAAGGGAGAGCTCGGATCCGGCTGCTAACAAAGCCCGAAAGGAAGCTGAGTTGGCTGCTGCCAC**  
**CGCTGAGCAATAACTAGCATAACCCCTTGGGCCTCTAACCGGGTCTTGAGGGGTTTTTTGCTGAAAGGAG**  
**GAACTATATCCGGATCGAGATCC**

T7 promoter, protospacer, sgRNA-optimised scaffold, HDV ribozyme, T7 terminator.

**pVAX-T7-sgRNA sequence.** BsmBI restriction sites to clone protospacer oligonucleotides are underlined, sgRNA sequence is in bold.

## pX-Gag-SpCas9 sequence

ATGGGTGCGAGAGCGTCGGTATTAAGCGGGGGAGAATTAGATCGATGGGAAAAAATTCGGTTAAGGCCAG  
GGGAAAGAAGAAGTACAAGCTAAAGCACATCGTATGGGCAAGCAGGGAGCTAGAACGATTTCGCAGTTAA  
TCCTGGCCTGTTAGAAACATCAGAAGGCTGTAGACAAATACTGGGACAGCTACAACCATCCCTTCAGACAG  
GATCAGAGGAGCTTCGATCACTATACAACACAGTAGCAACCCTCTATTGTGTGCACCAGCGGATCGAGATC  
AAGGACACCAAGGAAGCTTTAGACAAGATAGAGGAAGAGCAAAAACAAGTCCAAGAAGAAGGCCAGCAGG  
CAGCAGCTGACACAGGACACAGCAATCAGGTCAGCCAAAATTACCCTATAGTGCAGAACATCCAGGGGCAA  
ATGGTACATCAGGCCATATCACCTAGAACTTTAAATGCATGGGTAAAAGTAGTAGAAGAGAAGGCTTTTCAG  
CCCAGAAGTGATAACCATGTTTTTCAGCATTATCAGAAGGAGCCACCCACAGGACCTGAACACGATGTTGA  
ACACCGTGGGGGGACATCAAGCAGCCATGCAAATGTTAAAAGAGACCATCAATGAGGAAGCTGCAGAATG  
GGATAGAGTGCATCCAGTGCATGCAGGGCCTATTGCACCAGGCCAGATGAGAGAACCAAGGGGAAGTGAC  
ATAGCAGGAAGTACTAGTACCCTTCAGGAACAAATAGGATGGATGACAAATAATCCACCTATCCCAGTAGG  
AGAGATCTACAGGAGGTGGATAATCCTGGGATTGAACAAGATCGTGAGGATGTATAGCCCTACCAGCATT  
TGGACATAAGACAAGGACCAAAAAGAACCCTTTAGAGACTATGTAGACCGGTTCTATAAACTCTAAGAGCT  
GAGCAAGCTTCACAGGAGGTAAAAAATTGGATGACAGAAACCTTGTTGGTCCAAAATGCGAACCCAGATTG  
TAAGACCATCCTGAAGGCTCTCGGCCAGCGGCTACACTAGAAGAAATGATGACAGCATGTCAGGGAGTAG  
GAGGACCCGGCCATAAGGCAAGAGTTTTGGCTGAAGCAATGAGCCAAGTAACAAATTCAGCTACCATAATG  
ATGCAGAGAGGCAATTTTAGGAACCAAGAAAGATTGTTAAGTGTTCATTGTGGCAAAGAAGGGCACAC  
AGCCAGAAATTCAGGGCCCCTAGGAAAAAGGGCTGTTGAAAATGTGAAAGGAAGGACACCAAATGAAA  
GATTGTACTGAGAGACAGGCTAATTTTTTAGGGAAGATCTGGCCTTCCTACGAGGGAAGGCCAGGGAATTT  
TCTTCAGAGCAGACCAGAGCCAACAGCCCCACCAGAAGAGAGCTTCAGGTCTGGGGTAGAGACAACAATC  
CCCCTCAGAAGCAGGAGCCGATAGACAAGGAAGTGTATCCTTTAACTTCCCTCAGATCACTCTTTGGCAGC  
GACCCCTCGTCACAAAGCGCGCAAGGAAGCCAGAAGTATCCAATCGTCCAGACCGGTGCCACCATGGACTA  
TAAGGACCACGACGAGACTACAAGGATCATGATATTGATTACAAAGACGATGACGATAAGATGGCCCAA  
AGAAGAAGCGGAAGGTTCGGTATCCACGGAGTCCCAGCAGCCGACAAGAAGTACAGCATCGGCCTGGACAT  
CGGCACCAACTCTGTGGGCTGGGCCGTGATCACCGACGAGTACAAGGTGCCAGCAAGAAATTCAGGGT  
CTGGGCAACACCGACCGGCACAGCATCAAGAAGAACCTGATCGGAGCCCTGCTGTTTCGACAGCGGCGAAA  
CAGCCGAGGCCACCCGGCTGAAGAGAACCGCCAGAAGAAGATACACCAGACGGAAGAACCGGATCTGCTA  
TCTGCAAGAGATCTTCAGCAACGAGATGGCCAAGGTGGACGACAGCTTCTCCACAGACTGGAAGAGTCT  
TCCTGGTGAAGAGGATAAGAAGCAGGAGCGGCACCCCATCTTCGGCAACATCGTGGACGAGGTGGCCTA  
CCACGAGAAGTACCCACCATCTACCACCTGAGAAAGAAACTGGTGGACAGCACCGACAAGGCCGACCTGC  
GGCTGATCTATCTGGCCCTGGCCACATGATCAAGTTCGGGGCCACTTCTGATCGAGGGCGACCTGAAC  
CCCGACAACAGCGACGTGGACAAGCTGTTTCATCCAGCTGGTGCAGACCTACAACCAGCTGTTTCGAGGAAA  
CCCCATCAACGCCAGCGGCGTGGACGCCAAGGCCATCCTGTCTGCCAGACTGAGCAAGAGCAGACGGCTG  
GAAAATCTGATCGCCAGCTGCCCGGCGAGAAGAAGTGGCCTGTTTCGAAACCTGATTGCCCTGAGCCT  
GGGCTGACCCCAACTTCAAGAGCAACTTCGACCTGGCCGAGGATGCCAACTGCAGCTGAGCAAGGACA  
CCTACGACGACGACCTGGACAACCTGCTGGCCAGATCGGCGACCAGTACGCCGACCTGTTTCTGGCCGCC  
AAGAACCTGTCCGACGCCATCCTGCTGAGCGACATCCTGAGAGTGAACACCGAGATCACCAGGCCCCCT  
GAGCGCCTCTATGATCAAGAGATACGACGAGCACCACCAGGACCTGACCCTGCTGAAAGCTCTCGTGCGGC  
AGCAGCTGCCTGAGAAGTACAAAGAGATTTTTCTTCGACCAGAGCAAGAACGGCTACGCCGGCTACATTGAC  
GGCGGAGCCAGCCAGGAAGAGTCTACAAGTTCATCAAGCCATCCTGGAAAAGATGGACGGCACCGAGG  
AACTGCTCGTGAAGCTGAACAGAGAGGACCTGCTGCGGAAGCAGCGGACCTTCGACAACGGCAGCATCCC  
CCACCAGATCCACCTGGGAGAGCTGCACGCCATTCTGCGGCGGCAGGAAGATTTTTACCCATTCTGAAGG  
ACAACCGGAAAAGATCGAGAAGATCCTGACCTTCGCATCCCCTACTACGTGGGCCCTCTGGCCAGGGGA  
AACAGCAGATTCGCTGGATGACCAGAAAAGAGCGAGGAAACCATCACCCCTGGAACCTCGAGGAAGTGGT  
GGACAAGGGCGCTTCGCCCCAGAGCTTCATCGAGCGGATGACCAACTTCGATAAGAACCTGCCAACGAGA  
AGGTGCTGCCAAGCACAGCCTGCTGTACGAGTACTTCACCGTGTATAACGAGCTGACCAAAGTGAAATAC  
GTGACCGAGGGAATGAGAAAGCCCGCCTTCTGAGCGGCGAGCAGAAAAAGGCCATCGTGGACCTGCTGT  
TCAAGACCAACCGAAAAGTGACCGTGAAGCAGCTGAAAGAGGACTACTTCAAGAAAATCGAGTGCTTCGAC  
TCCGTGAAAATCTCCGCGGTGGAAGATCGGTTCAACGCCTCCCTGGGCACATACCACGATCTGCTGAAAAT  
TATCAAGGACAAGGACTTCTGGACAATGAGGAAAACGAGGACATTCTGGAAGATATCGTGCTGACCCTGA  
CACTGTTTGAGGACAGAGAGATGATCGAGGAACGGCTGAAAACCTATGCCACCTGTTTCGACGACAAAGTG

ATGAAGCAGCTGAAGCGGCGGAGATACACCGGCTGGGGCAGGCTGAGCCGGAAGCTGATCAACGGCATCC  
GGGACAAGCAGTCCGGCAAGACAATCCTGGATTTCTGAAGTCGACGGCTTCGCCAACAGAACTTCATG  
CAGCTGATCCACGACGACAGCTGACCTTTAAAGAGGACATCCAGAAAGCCCAGGTGTCCGGCCAGGGCG  
ATAGCCTGCACGAGCACATTGCCAATCTGGCCGGCAGCCCCGCCATTAAGAAGGGCATCCTGCAGACAGTG  
AAGGTGGTGGACGAGCTCGTGAAAGTGATGGGCCGGCACAAGCCCCGAGAACATCGTGATCGAAATGGCCA  
GAGAGAACCAGACCACCAGAAGGGACAGAAGAACAGCCGCGAGAGAATGAAGCGGATCGAAGAGGGCAT  
CAAAGAGCTGGGCAGCCAGATCCTGAAAGAACACCCCGTGGAAAACACCCAGCTGCAGAACGAGAAGCTGT  
ACCTGTACTACCTGCAGAATGGGCGGGATATGTACGTGGACCAGGAAGTGGACATCAACCGGCTGTCCGA  
CTACGATGTGGACCATATCGTGCCTCAGAGCTTTCTGAAGGACGACTCCATCGACAACAAGGTGCTGACCA  
GAAGCGACAAGAACCAGGGCAAGAGCGACAACGTGCCCTCCGAAGAGGTCTGAAGAAGATGAAGAACTA  
CTGGCGGCAGCTGCTGAACGCCAAGCTGATTACCCAGAGAAAGTTCGACAATCTGACCAAGGCCGAGAGA  
GGCGGCCTGAGCGAACTGGATAAGGCCGGCTTCATCAAGAGACAGCTGGTGGAAACCCGGCAGATCACAA  
AGCACGTGGCACAGATCCTGGACTCCCGGATGAACTAAGTACGACGAGAATGACAAGCTGATCCGGGAA  
GTGAAAGTGATCACCTGAAGTCCAAGCTGGTGTCCGATTTCCGGAAGGATTTCCAGTTTTACAAGTGCG  
CGAGATCAACAACCTACCACCGCCACGACGCCTACCTGAACGCCGTCGTGGGAACCGCCCTGATCAAAA  
AGTACCCTAAGCTGGAAAGCGAGTTCGTGTACGGCGACTACAAGGTGTACGACGTGCGGAAGATGATCGC  
CAAGAGCGAGCAGGAAATCGGCAAGGCTACCGCCAAGTACTTCTTCTACAGCAACATCATGAACTTTTTCA  
AGACCGAGATTACCTGGCCAACGGCGAGATCCGGAAGCGGCCTCTGATCGAGACAAACGGCGAAACCGG  
GGAGATCGTGTGGGATAAGGGCCGGGATTTTGCCACCGTGCAGAAAGTGCTGAGCATGCCCAAGTGAAT  
ATCGTGAAAAGACCGAGGTGCAGACAGGCGGCTTCAGCAAAGAGTCTATCCTGCCCAAGAGGAACAGCG  
ATAAGCTGATCGCCAGAAAGAAGGACTGGGACCCTAAGAAGTACGGCGGCTTCGACAGCCCCACCGTGGC  
CTATTCTGTGCTGGTGGTGGCCAAAGTGGAAAAGGGCAAGTCCAAGAACTGAAGAGTGTGAAAGAGCTG  
CTGGGGATCACCATCATGGAAAGAAGCAGCTTCGAGAAGAATCCCATCGACTTTCTGGAAGCCAAGGGCTA  
CAAAGAAGTGAAAAAGGACCTGATCATCAAGCTGCCTAAGTACTCCCTGTTTCGAGCTGGAAAACGGCCGGA  
AGAGAATGCTGGCCTCTGCCGGCGAACTGCAGAAGGGAAACGAACTGGCCCTGCCCTCCAAATATGTGAAC  
TTCCTGTACCTGGCCAGCCACTATGAGAAGCTGAAGGGCTCCCCGAGGATAATGAGCAGAAACAGCTGTT  
TGTGGAACAGCACAAAGCACTACCTGGACGAGATCATCGAGCAGATCAGCGAGTTCTCCAAGAGAGTGATCC  
TGGCCGACGCTAATCTGGACAAAGTGCTGTCCGCCTACAACAAGCACCCGGGATAAGCCCATCAGAGAGCAG  
GCCGAGAATATCATCCACCTGTTTACCCTGACCAATCTGGGAGCCCCTGCCGCTTCAAGTACTTTGACAC  
CACCATCGACCGGAAGAGGTACACCAGCACCAAAGAGGTGCTGGACGCCACCCTGATCCACCAGAGCATCA  
CCGGCCTGTACGAGACACGGATCGACCTGTCTCAGCTGGGAGGCGACAAAAGGCCGGCGGCCACGAAAAA  
GGCCGGCCAGGCCAAAAAAGAAAAAGTAA

Gag, linker, 3X-FLAG, SV40 NLS, SpCas9, nucleoplasmin NLS

**pX-Gag-SpCas9 sequence.** Coding sequence of Gag-SpCas9. The internal linker methionine, which mutated to alanine, was identified as responsible of free SpCas9 production is labelled in bold and underlined.

## pCDNA3 MinimalGag-SpCas9 sequence

ATGGGTGCGAGAGCGTCACTAGTCTAGTCTACCAGCATTCTGGACATAAGACAAGGACCAAAAG  
AACCCTTTAGAGACTATGTAGACCGGTTCTATAAACTCTAAGAGCCGAGCAAGCTTCACAGGA  
GGTAAAAAATTGGATGACAGAAACCTTGTGGTCCAAAATGCGAACCCAGATTGTAAGACTATT  
TTAAAAGCATTGGGACCAGCGGCTACACTAGAAGAAATGATGACAGCATGTCAGGGAGTAGGA  
GGACCCGGCCATAAGGCAAGAGTTTTGGCTGAAGCAATGAGCCAAGTAACAAATTCAGCTACCA  
TAATGCTGCAGCGTATGAAGCAGCTCGAGGATAAAGTGAAGAAGCTCTTAAGCAAAACTACCA  
CCTGGAAAACGAAGTGGCACGTCTGAAAAGCTTGTGGGTGAGACAGCATCCGCTCCTCCTCCC  
CCGTACGTAGGCCTGGCGGATCCGGCGGGTCCGGTGCCACCATGGACTATAAGGACCACGACGGAGAC  
TACAAGGATCATGATATTGATTACAAAGACGATGACGATAAGATGGCCCCAAAGAAGAAGCGGAAGTCCG  
TATCCACGGAGTCCCAGCAGCCGACAAGAAGTACAGCATCGGCCTGGACATCGGCACCAACTCTGTGGGCT  
GGGCCGTGATCACCGACGAGTACAAGGTGCCAGCAAGAAATCAAGGTGCTGGGCAACACCGACCGGCA  
CAGCATCAAGAAGAACCTGATCGGAGCCCTGCTGTTTCGACAGCGGCGAAACAGCCGAGGCCACCCGGCTG  
AAGAGAACC GCCAGAAGAAGATACACCAGACGGAAGAACCGGATCTGCTATCTGCAAGAGATCTTCAGCAA  
CGAGATGGCCAAGGTGGACGACAGCTTCTCCACAGACTGGAAGAGTCTTCTGGTGAAGAGGATAAG  
AAGCACGAGCGGCACCCCATCTTCGGCAACATCGTGGACGAGGTGGCCTACCACGAGAAGTACCCACCAT  
CTACCACCTGAGAAAGAACTGGTGGACAGCACCCGACAAGGCCGACCTGCGGCTGATCTATCTGGCCCTGG  
CCCACATGATCAAGTTCGGGGGCCACTTCTGATCGAGGGCGACCTGAACCCCGACAACAGCGACGTGGAC  
AAGCTGTTTCATCCAGCTGGTGCAGACCTACAACAGCTGTTTCGAGGAAAACCCCATCAACGCCAGCGGCGT  
GGACGCCAAGGCCATCCTGTCTGCCAGACTGAGCAAGAGCAGACGGCTGGAAAATCTGATCGCCAGCTG  
CCCGGCGAGAAGAAGAATGGCCTGTTTCGAAAACCTGATTGCCCTGAGCCTGGGCTGACCCCCAACTTCAA  
GAGCAACTTCGACCTGGCCGAGGATGCCAACTGCAGCTGAGCAAGGACACCTACGACGACGACCTGGAC  
AACCTGCTGGCCAGATCGGCGACCAGTACGCCGACCTGTTTCTGGCCGCAAGAACCTGTCCGACGCCAT  
CCTGCTGAGCGACATCCTGAGAGTGAACACCGAGATCACCAAGGCCCCCTGAGCGCCTCTATGATCAAGA  
GATACGACGAGCACACCAGGACCTGACCCTGCTGAAAGCTCTCGTGCGGCAGCAGCTGCCTGAGAAGTAC  
AAAGAGATTTTCTTCGACCAGAGCAAGAACGGCTACGCCGGCTACATTGACGGCGGAGCCAGCCAGGAAG  
AGTTCTACAAGTTCATCAAGCCATCCTGGAAAAGATGGACGGCACCGAGGAAGTCTCGTGAAGCTGAAC  
AGAGAGGACCTGCTGCGGAAGCAGCGGACCTTCGACAACGGCAGCATCCCCACCAGATCCACCTGGGAG  
AGCTGCACGCCATTCTGCGGCGGCAGGAAGATTTTACCCATTCTGAAGGACAACCGGAAAAGATCGAG  
AAGATCCTGACCTCCGCATCCCCTACTACGTGGGCCCTCTGGCCAGGGGAAACAGCAGATTCGCCTGGAT  
GACCAGAAAGAGCGAGGAAACCATCACCCCTGGAACCTTCGAGGAAGTGGTGGACAAGGGCGCTTCCGCC  
CAGAGCTTCATCGAGCGGATGACCAACTTCGATAAGAACCTGCCAACGAGAAGGTGCTGCCAAGCACAG  
CCTGCTGTACGAGTACTTCACCGTGTATAACGAGCTGACCAAAGTGAATACGTGACCGAGGGAATGAGAA  
AGCCCGCTTCTGAGCGGCGAGCAGAAAAAGGCCATCGTGGACCTGCTGTTCAAGACCAACCGGAAAGT  
GACCGTGAAGCAGCTGAAAGAGGACTACTTCAAGAAAATCGAGTGCTTCGACTCCGTGGAAATCTCCGGCG  
TGGAAGATCGGTTCAACGCTCCCTGGGCACATACCACGATCTGCTGAAAATTATCAAGGACAAGGACTTC  
CTGGACAATGAGGAAAACGAGGACATTCTGGAAGATATCGTGCTGACCCTGACACTGTTTGAGGACAGAGA  
GATGATCGAGGAACGGCTGAAAACCTATGCCACCTGTTTCGACGACAAAGTATGAAGCAGCTGAAGCGG  
CGGAGATACACCGGCTGGGGCAGGCTGAGCCGGAAGCTGATCAACGGCATCCGGGACAAGCAGTCCGGCA  
AGACAATCCTGGATTTCTGAAGTCCGACGGCTTCGCCAACAGAAAATTCATGCAGCTGATCCACGACGAC  
AGCCTGACCTTTAAAGAGGACATCCAGAAAAGCCAGGTGTCCGGCCAGGGCGATAGCCTGCACGAGCACAT  
TGCCAATCTGGCCGCGACCCCCGCCATTAAGAAGGGCATCCTGCAGACAGTGAAGGTGGTGGACGAGCTC  
GTGAAAGTATGGGCCGCGACAAGCCCCGAGAACATCGTGATCGAAATGGCCAGAGAGAACCAGACCACC  
AGAAGGGACAGAAGAACAGCCGCGAGAGAATGAAGCGGATCGAAGAGGGCATCAAAGAGCTGGGCAGCCA  
GATCCTGAAAGAACACCCCGTGGAAAACACCCAGCTGCAGAACGAGAAGCTGTACCTGTACTACCTGCAGA  
ATGGGCGGGATATGTACGTGGACCAGGAACTGGACATCAACCGGCTGTCCGACTACGATGTGGACCATAT  
CGTGCTCAGAGCTTTCTGAAGGACGACTCCATCGACAACAAGGTGCTGACCAGAAGCGACAAGAACCAGGG  
GCAAGAGCGACAACGTGCCCTCCGAAGAGGTGCTGAAGAAGATGAAGAAGTACTGGCGGCAGCTGCTGAA  
CGCCAAGCTGATTACCCAGAGAAAGTTCGACAATCTGACCAAGGCCGAGAGAGGGCGGCTGAGCGAACTG  
GATAAGGCCGGCTTCATCAAGAGACAGCTGGTGGAAAACCCGGCAGATCACAAAGCACGTGGCACAGATCCT  
GGACTCCCGGATGAACACTAAGTACGACGAGAATGACAAGCTGATCCGGGAAGTGAAGTATCACCCCTGA  
AGTCCAAGCTGGTGTCCGATTTCCGAAGGATTTCCAGTTTTACAAAGTGCAGGAGATCAACAACCTACCAC

CACGCCACGACGCCTACCTGAACGCCGTCGTGGGAACCGCCCTGATCAAAAAGTACCCTAAGCTGGAAAG  
CGAGTTCGTGTACGGCGACTACAAGGTGTACGACGTGCGGAAGATGATCGCCAAGAGCGAGCAGGAAATC  
GGCAAGGCTACCGCCAAGTACTTCTTCTACAGCAACATCATGAACTTTTTCAAGACCGAGATTACCCTGGC  
CAACGGCGAGATCCGGAAGCGGCCTCTGATCGAGACAAACGGCGAAAACCGGGGAGATCGTGTGGGATAAG  
GGCCGGGATTTTGCCACCGTGCGGAAAGTGCTGAGCATGCCCAAGTGAATATCGTGAAAAAGACCGAGG  
TGCAGACAGGCGGCTTCAGCAAAGAGTCTATCCTGCCCAAGAGGAACAGCGATAAGCTGATCGCCAGAAAG  
AAGGACTGGGACCCTAAGAAGTACGGCGGCTTCGACAGCCCCACCGTGGCCTATTCTGTGCTGGTGGTGG  
CCAAAGTGGAAAAGGGCAAGTCCAAGAACTGAAGAGTGTGAAAGAGCTGCTGGGGATCACCATCATGGA  
AAGAAGCAGCTTCGAGAAGAATCCCATCGACTTTCTGGAAGCCAAGGGCTACAAAGAAGTAAAAAGGACC  
TGATCATCAAGCTGCCTAAGTACTCCCTGTTTCGAGCTGGAAAACGGCCGGAAGAGAATGCTGGCCTCTGCC  
GGCGAACTGCAGAAGGGAAACGAAGTGGCCCTGCCCTCCAAATATGTGAACTTCTGTACCTGGCCAGCCA  
CTATGAGAAGCTGAAGGGCTCCCCGAGGATAATGAGCAGAAACAGCTGTTTGTGGAACAGCACAAAGCACT  
ACCTGGACGAGATCATCGAGCAGATCAGCGAGTTCTCCAAGAGAGTGATCCTGGCCGACGCTAATCTGGAC  
AAAGTGCTGTCCGCCTACAACAAGCACCGGGATAAGCCCATCAGAGAGCAGGCCGAGAATATCATCCACCT  
GTTTACCCTGACCAATCTGGGAGCCCCTGCCGCCTTCAAGTACTTTGACACCACCATCGACCGGAAGAGGT  
ACACCAGCACCAAGAGGTGCTGGACGCCACCCTGATCCACCAGAGCATCACCGGCCTGTACGAGACACGG  
ATCGACCTGTCTCAGCTGGGAGGCGACAAAAGGCCGGCGGCCACGAAAAAGGCCGGCCAGGCCAAAAAGA  
AAAAGTAA

Gag-derived domains, Gcn4, RSV-p2b, linker, 3X-FLAG, SV40 NLS, SpCas9, nucleoplasmin NLS.

**pCDNA3 MinimalGag-SpCas9 sequence.** Minimal-Gag coding sequence is labelled in bold. The internal linker methionine, which mutated to alanine, was identified as responsible of free SpCas9 production is underlined.

**Table S1.** Sequences of oligonucleotides used to construct pVAX-T7-sgRNA expression plasmids and sequences of relative target sites

| <b>sgRNA</b>                 | <b>oligo 1 (*)</b>              | <b>oligo2 (*)</b>                 | <b>target site (**)</b>                                            |
|------------------------------|---------------------------------|-----------------------------------|--------------------------------------------------------------------|
| <i>EGFP5</i>                 | tataGGAAGTTCGAGGG<br>CGACACCC   | aaacGGGTGTCGCCCTC<br>GAACTTCCCC   | ggtGAAGTTCGAGGGCGACACCCTG<br><b>Gtga</b>                           |
| <i>EGFPBi</i>                | tataGGGCACGGGCAG<br>CTTGCCGG    | aaacCCGGCAAGCTGCC<br>CGTGCCCCC    | ccaCCGGCAAGCTGCCCCGTGCCCTG<br><b>Gccc</b>                          |
| <i>EGFP3g</i><br><i>W</i>    | tataGGGCTCGTGACCA<br>CCCTGACCTA | aaacTAGGTCAGGGTGG<br>TCACGAGCCCCC | accCTCGTGACCACCCTGACCTA <b>CGG</b><br>cgt                          |
| <i>GFPI2</i>                 | tataGGTGGGCACCGG<br>CTTCCCCG    | aaacCGGGGAAGCCGGT<br>GCCACCCCC    | ggtGGTGGGCACCGGCTTCCCC <b>GAG</b><br><b>Gaca</b>                   |
| <i>VEGFA</i><br><i>site3</i> | tataGGTGAGTGAGTGT<br>GTGCGTG    | aaacCACGCACACACTCA<br>CTCACC      | gtgGGTGAGTGAGTGTGTGCGT <b>GTG</b><br><b>Gggt</b>                   |
| <i>VEGFA</i><br>OT1          | --                              | --                                | gtg <b>A</b> GTGAGTGAGTGTGT <b>G</b> GT <b>GGG</b><br><b>Gggg</b>  |
| <i>VEGFA</i><br>OT3          | --                              | --                                | atg <b>T</b> GT <b>G</b> GGTGAGTGTGTGCGT <b>GAG</b><br><b>Gaca</b> |
| <i>CXCR4</i>                 | tataGGAAGCGTGATGA<br>CAAAGAGG   | aaacCCTCTTTGTCATCA<br>CGCTTCCCC   | aagGGAAGCGTGATGACAAAG <b>AGG</b> a<br>gg                           |

(\*) Lowercase indicates sticky ends used for cloning into pVAX-T7-sgRNA plasmid.

(\*\*) Mismatches are highlighted in red, PAM is in bold. Context sequence around target site are in lowercase.

**Table S2.** Sequences of the oligonucleotides used for PCR amplifications.

| <b>oligo</b>               | <b>sequence</b>                    |
|----------------------------|------------------------------------|
| T7 fw - HindIII            | ACTAAGCTTGTGACCATGAACACGATTAACATCG |
| T7 rev - XbaI              | TAATCTAGATTACGCGAACGCGAAGTC        |
| T7 promoter fw             | GAAATTAATACGACTCACTATAGG           |
| gRNA end rev               | AAGCACCGACTCGGTGCCA                |
| <i>EGFP</i> fw             | ACCATGGTGAGCAAGGGCGAGGA            |
| <i>EGFP</i> rev            | AGCTCGTCCATGCCGAGAGTGATC           |
| <i>VEGFA site3</i> ON fw   | GCATACGTGGGCTCCAACAGGT             |
| <i>VEGFA site3</i> ON rev  | CCGCAATGAAGGGGAAGCTCGA             |
| <i>VEGFA site3</i> OT1 fw  | CAGGCGCCTTGGGCTCCGTCA              |
| <i>VEGFA site3</i> OT1 rev | CCCCAGGATCCGCGGGTCAC               |
| <i>VEGFA site3</i> OT3 fw  | AGTCAGCCCTCTGTATCCCTGGA            |
| <i>VEGFA site3</i> OT3 rev | GAGATATCTGCACCCTCATGTTCAC          |
| <i>CXCR4</i> fw            | AGAGGAGTTAGCCAAGATGTGACTTTGAAACC   |
| <i>CXCR4</i> rev           | GGACAGGATGACAATACCAGGCAGGATAAGGCC  |
