# Supplementary material for: VSV-G-Enveloped Vesicles for Traceless Delivery of CRISPR-Cas9
Source: PubMed Central journal article supplement — Mol Ther Nucleic Acids. 2018 Jul 11;12:453–62. doi: 10.1016/j.omtn.2018.05.010 (PMC6041463; doi:10.1016/j.omtn.2018.05.010), 2018-07-11
Supplement: mmc3.pdf [file mmc3.pdf]

# VSV-G-Enveloped Vesicles for Traceless Delivery of CRISPR-Cas9

Claudia Montagna,<sup>1,5</sup> Gianluca Petris,<sup>1,5</sup> Antonio Casini,<sup>1</sup> Giulia Maule,<sup>1</sup> Gian Marco Franceschini,<sup>1</sup> Ilaria Zanella,<sup>1</sup> Luciano Conti,<sup>2</sup> Francesca Arnoldi,<sup>3,4</sup> Oscar R. Burrone,<sup>3</sup> Lorena Zentilin,<sup>3</sup> Serena Zacchigna,<sup>3,4</sup> Mauro Giacca,<sup>3,4</sup> and Anna Cereseto<sup>1</sup>

<sup>1</sup>Laboratory of Molecular Virology, University of Trento, Centre for Integrative Biology, 38123 Trento, Italy; <sup>2</sup>Laboratory of Stem Cell Biology, University of Trento, Centre for Integrative Biology, 38123 Trento, Italy; <sup>3</sup>International Centre for Genetic Engineering and Biotechnology (ICGEB), AREA Science Park, Padriciano 99, 34149 Trieste, Italy; <sup>4</sup>Department of Medicine, Surgery and Health Sciences, University of Trieste, 34149 Trieste, Italy

**The method of delivery of CRISPR-Cas9 into target cells is a strong determinant of efficacy and specificity in genome editing. Even though high efficiency of Cas9 delivery is necessary for optimal editing, its long-term and high levels of expression correlate with increased off-target activity. We developed vesicles (VEsiCas) carrying CRISPR-SpCas9 ribonucleoprotein complexes (RNPs) that are efficiently delivered into target cells through the fusogenic glycoprotein of the vesicular stomatitis virus (VSV-G). A crucial step for VEsiCas production is the synthesis of the single guide RNA (sgRNA) mediated by the T7 RNA polymerase in the cytoplasm of producing cells as opposed to canonical U6-driven Pol III nuclear transcription. In VEsiCas, the absence of DNA encoding SpCas9 and sgRNA allows rapid clearance of the nuclease components in target cells, which correlates with reduced genome-wide off-target cleavages. Compared with SpCas9 RNPs electroporation, which is currently the method of choice to obtain transient SpCas9 activity, VEsiCas deliver the nuclease with higher efficiency and lower toxicity. We show that a wide variety of cells can be edited through VEsiCas, including a variety of transformed cells, induced pluripotent stem cells (iPSCs), and cardiomyocytes, *in vivo*. VEsiCas is a traceless CRISPR-Cas9 delivery tool for efficient and safe genome editing that represents a further advancement toward the therapeutic use of the CRISPR-Cas9 technology.**

## INTRODUCTION

CRISPR-Cas9-mediated genome editing technologies have tremendous potential for both basic and clinical applications.<sup>1–10</sup> In CRISPR-Cas9 applications, cleavage specificity and delivery efficiency strongly determine the outcome of genome editing.<sup>11</sup> High expression levels of Cas9 for long periods result in high numbers of non-specific cleavages.<sup>12,13</sup> So, by affecting the levels and kinetics of expression, the method of delivery is a key determinant of editing efficiency and specificity. In fact, successful genome editing can be obtained through DNA-free delivery of CRISPR-SpCas9 ribonucleoprotein complexes (RNPs), which allows transient expression of the RNA-guided nuclease.<sup>14–16</sup> However, the advantages offered by RNP delivery via physical (electroporation)<sup>14</sup> or chemical (lipid- and polymer-based

reagents)<sup>16,17</sup> methods are counterbalanced by strong limitations of their *in vivo* use.<sup>18</sup> Opposed to these methods, viral vectors, including those of retroviral origin, are widely used for efficient delivery of Cas9 and sgRNA genes both *in vitro* and *in vivo*.<sup>8,19,20</sup> Nevertheless, these delivery tools are generally not ideal for transient therapeutic approaches because of long-term transgene expression and potential risks for insertional mutagenesis.<sup>13,21</sup> Among the non-integrating vectors, which, in principle, should prevent mutagenic integration,<sup>22–24</sup> those derived from adeno-associated viruses (AAVs) are suitable only for the expression of small transgenes (no greater than ~4 kb) and are thus not fully compatible with the CRISPR-Cas9 technology. To circumvent the genotoxicity generated by retroviral vectors while preserving viral delivery efficiency, an integration-defective lentiviral vector (IDLV) vector carrying a single guide RNA (sgRNA) transgene and packaged with the SpCas9 protein has been developed.<sup>25</sup> A major improvement in the completely traceless delivery of exogenous protein cargos into cells is potentially offered by the development of virus-like particles (VLPs).<sup>26</sup> The viral origin of VLPs assures the efficient transduction of target cells even though no viral genomes is carried by the particles, thus allowing rapid clearance of the shuttled protein and RNAs. VLPs have been mainly used in the past decade for vaccination purposes<sup>27</sup> or for the delivery of exogenous proteins.<sup>26,28</sup> To minimize the viral elements, protein cargo delivery can be obtained with vesicles made exclusively with the envelope glycoprotein of the vesicular stomatitis virus (VSV-G).<sup>29</sup>

Here we developed efficient and traceless delivery of SpCas9 and sgRNAs consisting of vesicles, named VEsiCas, that carry SpCas9 RNPs and are decorated with the fusogenic VSV-G. To obtain complete incorporation of sgRNAs into VEsiCas, we exploited the

Received 27 October 2017; accepted 14 May 2018;  
<https://doi.org/10.1016/j.omtn.2018.05.010>

<sup>5</sup>These authors contributed equally to this work.

**Correspondence:** Gianluca Petris, Laboratory of Molecular Virology, University of Trento, Centre for Integrative Biology, Via Sommarive 9, 38123, Trento, Italy.

**E-mail:** [gianluca.petris@unitn.it](mailto:gianluca.petris@unitn.it)

**Correspondence:** Anna Cereseto, Laboratory of Molecular Virology, University of Trento, Centre for Integrative Biology, Via Sommarive 9, 38123, Trento, Italy.

**E-mail:** [anna.cereseto@unitn.it](mailto:anna.cereseto@unitn.it)

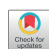

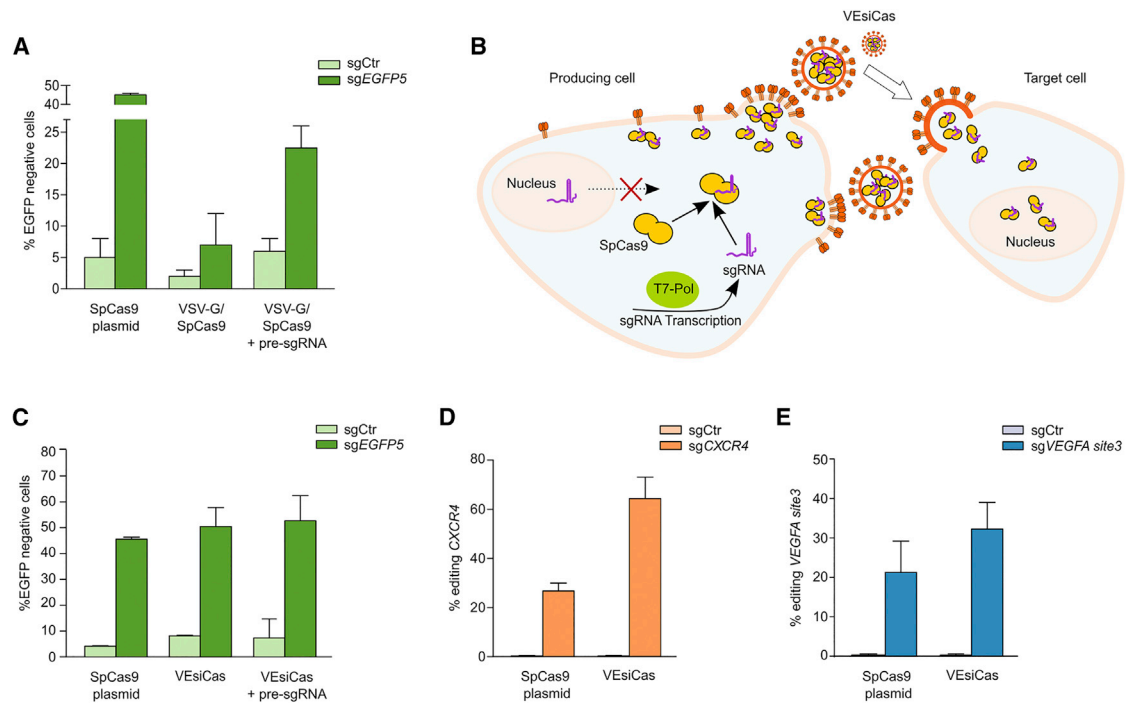

**Figure 1. Design and Genome Editing Activity of VEsiCas**

(A) EGFP disruption assay with VSV-G/SpCas9 vesicles produced in HEK293T cells. Shown are percentages of EGFP knockout HEK293-EGFP cells generated by transfection of SpCas9 (SpCas9 plasmid) together with EGFP targeting (sgEGFP5) or control (sgCtrl) sgRNA or transduction with VSV-G/SpCas9 vesicles carrying U6-transcribed sgRNA. Where indicated, HEK293-EGFP cells were pre-transfected with sgEGFP5 or sgCtrl (+ pre-sgRNA) prior to VSV-G/SpCas9 vesicle treatment. Data are presented as mean  $\pm$  SEM for  $n = 2$  independent experiments. (B) Schematic of VEsiCas production in BSR-T7/5 cells. T7 RNA polymerase, expressed in the cytosol, regulates cytosolic sgRNA expression by means of the T7 promoter. Vesicles decorated with VSV-G, expressed by BSR-T7/5 producer cells, bud incorporating SpCas9 complexed with sgRNA to form VEsiCas. In target cells, VEsiCas release active SpCas9-sgRNA complexes that enter the nuclei through two nuclear localization sequences introduced in SpCas9. (C) Genome activity of VEsiCas produced in BSR-T7/5 on HEK293-EGFP cells. Shown are percentages of non-fluorescent HEK293-EGFP cells following transfection of SpCas9 (SpCas9 plasmid) together with sgRNAs (sgEGFP5 or sgCtrl) or treatment with VEsiCas carrying sgRNAs (sgEGFP5 or sgCtrl) either with or without pre-transfection with sgRNAs, as indicated. Data are presented as mean  $\pm$  SEM for  $n = 2$  independent experiments. (D and E) VEsiCas-mediated editing of the CXCR4 (D) and VEGFA site3 (E) genomic loci. Percentages of indel formation in HEK293T cells were measured through TIDE analysis following transfection of SpCas9 (SpCas9 plasmid) together with sgRNAs (sgCXCR4, sgVEGFA site3, or sgCtrl) or after three sequential treatments with VEsiCas carrying sgRNAs (sgCXCR4, sgVEGFA site3, or sgCtrl). Data are presented as mean  $\pm$  SEM for  $n = 2$  independent experiments.

T7 RNA polymerase transcription system, which provides high rates of cytoplasmic sgRNA transcription in producing cells. VEsiCas were efficiently used in this study for genome editing applications with a variety of cell types in culture as well as *in vivo* after injection into the cardiac muscle of a mouse model. Finally, we tested genome editing procedures where simultaneous targeting of more than one locus is required, such as for genomic deletions or for Cas9-nickase applications, demonstrating the plasticity of VEsiCas for more complex strategies of genetic surgery.

## RESULTS

### Design and Development of VEsiCas

VSV-G-induced vesicles have been reported to mediate protein transfer in the absence of additional viral components.<sup>29</sup> We tested whether VSV-G vesicles could be adapted to DNA-free delivery of CRISPR-Cas9 RNPs. SpCas9 and an sgRNA toward the EGFP coding sequence (sgEGFP5) were expressed together with VSV-G in HEK293T cells, and the derived conditioned clarified medium was

applied to a fluorescent reporter cell line, HEK293-EGFP. To evaluate the efficacy of EGFP editing mediated by the VSV-G vesicle treatments, a comparative analysis was performed with SpCas9-sgRNA plasmid transfections, used as a benchmark, similar to previous reports.<sup>14–16,30</sup> The expression of EGFP was poorly altered under these conditions, indicating inefficient genome editing, whereas efficient editing was observed by transfecting SpCas9 together with the sgRNA (Figure 1A). The limited editing activity was not explained by the lack of delivered protein because both vesicles and target cells were positive for SpCas9 (Figure S1A). These results prompted us to evaluate whether the limiting factor for vesicle activity could be insufficient incorporation of sgRNA. To this aim, the HEK293-EGFP target cells were transfected with plasmids expressing sgEGFP5 before treatment with VSV-G vesicles purified from HEK293T cells expressing SpCas9-sgRNA. Under these experimental conditions, we obtained editing levels that were closer to those observed in cells transfected with SpCas9 and the sgRNA (Figure 1A, compare the sixth and second columns of the graph). These results clearly suggested that the

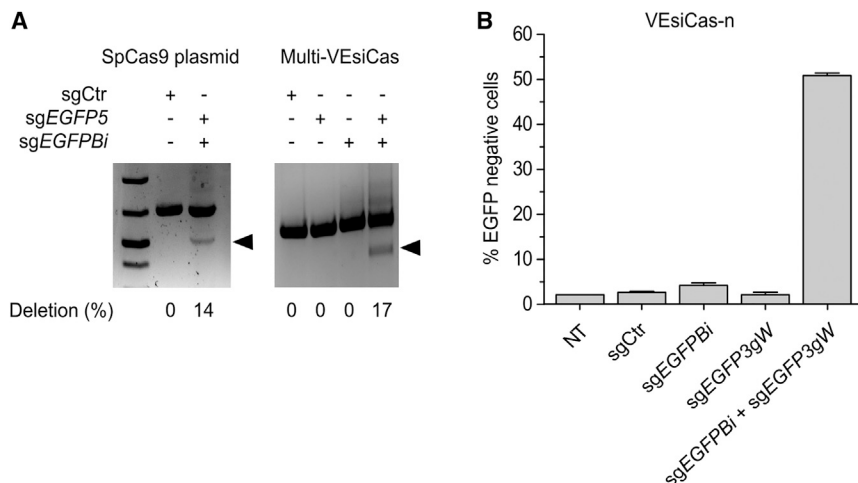**Figure 2. Genome Editing by Multiplexed VEsCas**

(A) Gene deletion using VEsCas. Shown is gel electrophoresis analysis of the *EGFP* locus deletion obtained in HEK293-EGFP cells through Multi-VEsCas (right) treatment or by transfection with SpCas9 together with specific sgRNAs (sgEGFP5 and sgEGFPBi) (left). The amount of deletion (percent) was quantified by densitometry. Arrowheads indicate the expected band corresponding to PCR amplification of the deleted *EGFP* locus. (B) Activity of VEsCas delivering SpCas9 nickase. Shown are percentages of EGFP knockout cells following incubation with VEsCas-n, carrying SpCas9 nickase loaded with sgRNA toward two sites in the *EGFP* locus (sgEGFP3gW and sgEGFPBi) or with sgCtr. NT, not treated. Data are presented as mean  $\pm$  SEM for  $n = 2$  independent experiments.

limited editing observed with the SpCas9/VSV-G preparations was due to inefficient delivery of the sgRNA. We speculated that poor sgRNA delivery could be due to inefficient formation of SpCas9-sgRNA RNPs during vesicle production. In particular, the RNA polymerase III (Pol III)-synthesized sgRNAs in the nuclei may be poorly coupled with cytoplasmic SpCas9 to form RNPs at cell periphery, close to the nascent VSV-G vesicles. To test this hypothesis, we employed a T7 RNA polymerase-driven transcription system<sup>31,32</sup> that catalyzes RNA synthesis in the cytoplasm (schematized in Figure 1B). The sgRNAs were cloned downstream of the T7 promoter, and the 5' hepatitis delta virus (HDV) ribozyme was introduced between the sgRNA coding sequence and the T7 RNA polymerase terminator to induce the formation of mature sgRNAs with unmodified 3' constant regions.<sup>33</sup> The VSV-G-enveloped SpCas9 vesicles were produced in cell lines stably expressing the T7 RNA polymerase and resistant to toxicity induced by high levels of uncapped 5'-triphosphate cytoplasmic RNA generated by this transcriptional system<sup>32,34,35</sup> (Figure S1B). The derived VSV-G-enveloped SpCas9 Vesicles, VEsCas, produced in BSR-T7/5 cells expressing sgEGFP5, were verified for SpCas9 incorporation (Figure S1C), observing that SpCas9 was about 1.5%–2% of the total protein content of VEsCas (Figure S1D). VEsCas produced in BSR-T7/5 cells induced at least 50% loss of EGFP fluorescence in HEK293-EGFP cells, very similarly to knockouts observed with SpCas9-sgRNA plasmid transfection or VEsCas treatments of cells pre-transfected with sgEGFP5 (Figure 1C). To test VEsCas properties in gene substitution experiments, non-fluorescent cells stably transfected with a single copy of the EGFP Y66S variant were treated with VEsCas together with a donor DNA carrying a truncated wild-type EGFP sequence corresponding to the Y66S mutated region. The production of EGFP fluorescent cells indicated proper repair of the EGFP gene by homology-directed repair (HDR), demonstrating the efficacy of VEsCas in knockin applications (Figure S2). VEsCas were then tested toward two genomic loci, *CXCR4* and *VEGFA*, commonly used as benchmarks in genome-editing experiments,<sup>11</sup> at these loci, VEsCas induced similar percentages of insertions or deletions (indels) as those obtained with

SpCas9-sgRNA plasmid transfection (Figures 1D and 1E). These results were obtained with multiple rounds (three times) of VEsCas spinoculation, with single spinoculation treatments producing cumulative editing effects (Figure S3).

SpCas9 pseudotransduction was also tested using lentivirus-based VLPs (lenti-VLPs). The HIV-1 Gag domain or a reduced portion of it (MinimalGag) were reported to generate VLPs, described to efficiently transfer protein cargos to recipient cells.<sup>36</sup> SpCas9 fused to Gag or MinimalGag was verified as functionally active in genome editing activity against the EGFP locus (Figures S4A–S4C). The two SpCas9-Gag chimeras were used to obtain lenti-VLPs in BSR-T7/5 cells, which produced high percentages of indels in the *EGFP*, *CXCR4*, and *VEGFA* loci (Figures S4D–S4G). However, because no dramatic improvements in genome editing efficacy were obtained with lenti-VLPs, VEsCas carrying exclusively the VSV-G viral element were used hereafter.

Overall, our data clearly show that VEsCas efficiently deliver SpCas9-sgRNA RNPs free from encoding DNA or additional elements of viral origin. A key factor to obtain highly efficient genome editing particles was the relocation of sgRNA expression from the nucleus to the cytoplasm of producing cells, which was obtained with cytoplasmic T7 RNA polymerase in appropriate permissive cells.

### Multiplexed VEsCas

Because genome editing applications such as targeted genomic deletions may require the simultaneous delivery of more than one sgRNA, we evaluated the possibility to incorporate multiple guides into VEsCas (Multi-VEsCas). Multi-VEsCas were produced in BSR-T7/5 cells expressing two T7-driven EGFP-targeting sgRNAs (sgEGFP5 and sgEGFPBi). Incubation of HEK293-EGFP reporter cells with Multi-VEsCas carrying both sgRNAs generated the expected deletion in the *EGFP* locus with  $\sim$ 17% efficiency, which was similar to the one obtained with transient transfection of plasmids encoding SpCas9 and the corresponding sgRNAs ( $\sim$ 14%) (Figure 2A).

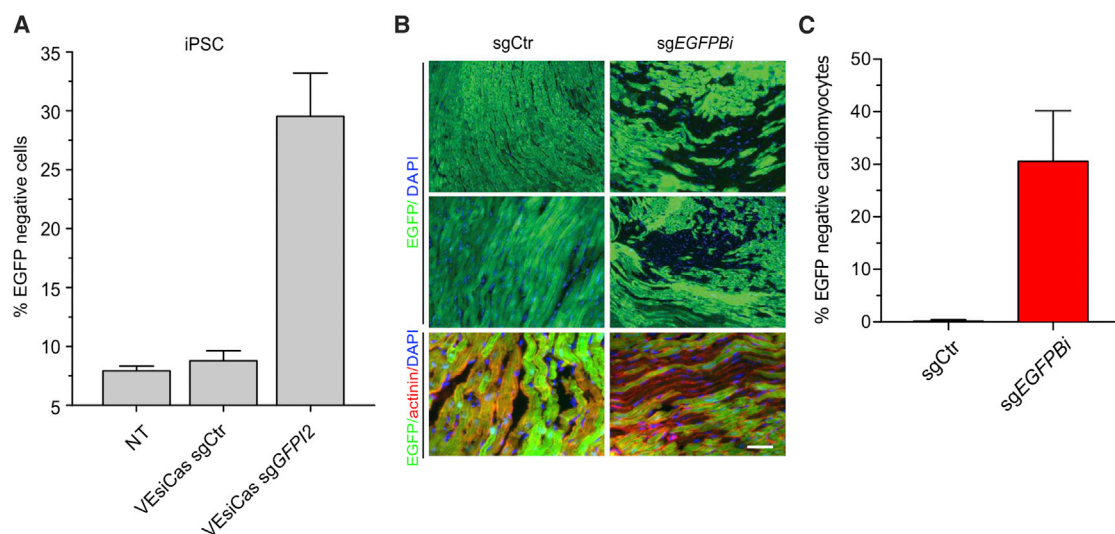

**Figure 3. Genome Editing Activity in Human iPSCs and in the Heart of an EGFP Mouse Model**

(A) VEsicCas activity in induced pluripotent stem cells (iPSCs). Shown is the percentage of non-fluorescent iPSCs stably expressing EGFP after treatment with VEsicCas carrying either sgCtr or sgGFP12. Data are presented as mean  $\pm$  SEM for  $n = 2$  independent experiments. (B) VEsicCas-mediated gene disruption in the cardiac muscle of EGFP mice. Shown are fluorescence microscopy images of cardiac tissue sections from EGFP transgenic mice 10 days after intra-cardiac injection of VEsicCas carrying sgCtr or sgEGFPBi. DAPI was used as a nuclear counterstain. Immunostaining for  $\alpha$ -actinin was performed to identify cardiomyocytes (bottom). A representative sample of  $n = 5$  experiments is shown. Scale bar, 100  $\mu$ m. (C) Quantification of VEsicCas EGFP knockout in cardiac tissue. The bar graph shows the percentage of non-fluorescent cardiomyocytes following VEsicCas treatments (mean  $\pm$  SEM of  $n = 5$  independent experiments).

Conversely, VEsicCas carrying each individual sgRNA (either sgEGFP5 or sgEGFPBi) were not able to produce any detectable deletion into the target locus (Figure 2A). The flexibility of the VEsicCas delivery platform was further demonstrated by incorporating the SpCas9 nickase (SpCas9-n, D10A mutant)<sup>37</sup> to generate VEsicCas-n carrying two closely positioned sgRNAs targeting the EGFP coding sequence. VEsicCas-n were prepared either with individual sgRNAs (sgEGFPBi or sgEGFP3gW) or with the sgRNAs in combination (sgEGFPBi and sgEGFP3gW). A single treatment of HEK293-EGFP cells with VEsicCas-n carrying both sgRNAs produced a robust decrease in the number of fluorescent cells (50%), whereas VEsicCas-n delivering individual sgRNAs did not downregulate EGFP expression, as expected (Figure 2B). These data indicate that more than one sgRNA can be delivered simultaneously by VEsicCas, demonstrating their applicability to generate deletions and to deliver SpCas9 nickase.

#### VEsicCas Editing Efficiency in Cells and *In Vivo*

Increasing amounts of VEsicCas resulted into a proportional increase in editing activity (Figure S3). Moreover, side-by-side comparison with electroporation protocols, which are often used to deliver Cas9 into cells for genome editing, revealed that VEsicCas are more efficient. In fact, compared with electroporation, a lesser amount of SpCas9 delivered by VEsicCas was required to obtain similar percentages of EGFP knockout cells (Figure S5A). Moreover, viability assays using the same experimental conditions as in Figure S5A revealed that, conversely to electroporation, VEsicCas induced minimal cell toxicity (Figure S5B). The efficacy of VEsicCas was tested in different cell lines,

including adherent cells (HeLa), suspension cells (J-Lat-A1), and human induced pluripotent stem cells (iPSCs) expressing EGFP, showing a robust decrease in the number of fluorescent cells in all tested models (Figure 3A; Figure S6). Lastly, VEsicCas were tested in the cardiac muscle of EGFP transgenic mice. VEsicCas were injected into the hearts of 5-day-old mice, which were analyzed for levels of EGFP fluorescence 10 days after treatment. The cardiac tissue from treated animals was stained using antibodies against  $\alpha$ -actinin to specifically evaluate EGFP fluorescence in cardiomyocytes. As shown in Figure 3B, large areas of non-fluorescent cardiomyocytes could be observed close to the VEsicCas injection site. The efficacy of VEsicCas *in vivo* editing was quantified by measuring the percentage of EGFP-negative cardiomyocytes in at least three sections obtained from 5 mice derived from either control (VEsicas sgRNA Ctr) or sgEGFPBi VEsicCas groups. The data reported in Figure 3C show that, compared with the control, sgEGFPBi VEsicCas-treated mice showed around 30% more EGFP-negative cardiomyocytes.

Overall, these data show that VEsicCas are efficient tools to deliver SpCas9 RNPs for genome editing in culture cells as well as *in vivo*.

#### Limited Off-Target Activity by SpCas9 Delivered through VEsicCas

The off-target activity produced by Cas9 is still one of the main limitations for its therapeutic use. The transient expression of the nuclease in target cells has been shown to limit non-specific cleavages.<sup>13,14</sup> To address this point, the kinetics of SpCas9 intracellular levels delivered through VEsicCas in comparison with the amounts

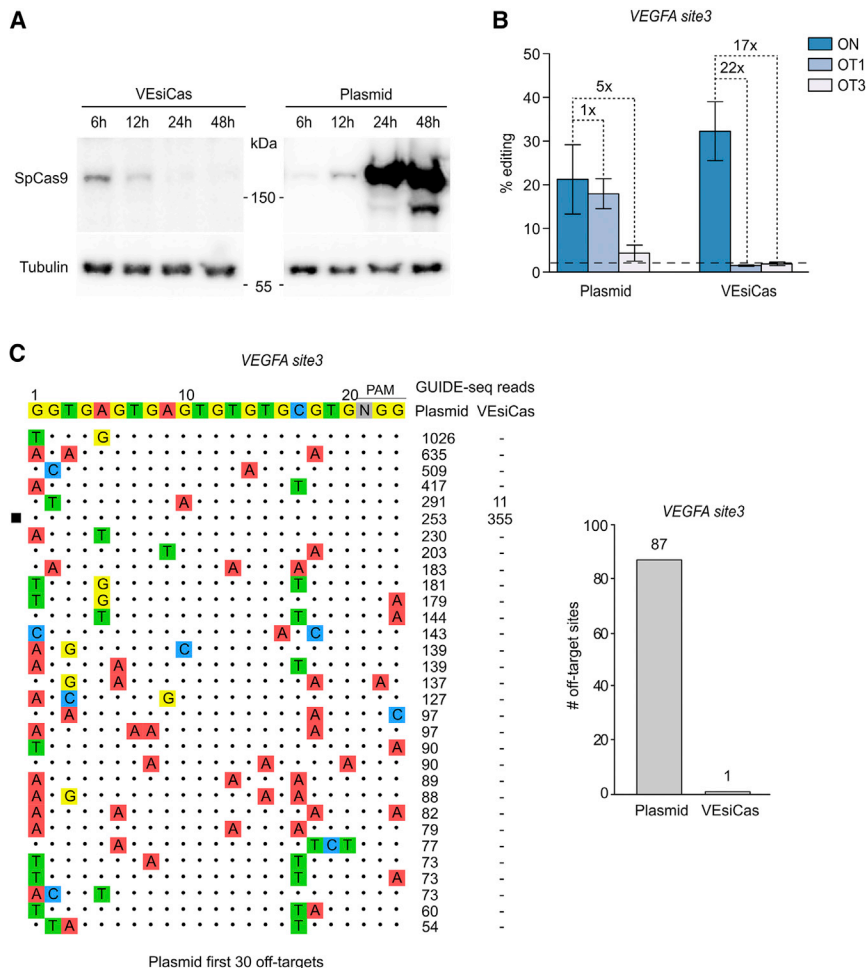

**Figure 4. Analysis of On/Off-Target Activity Generated by VESiCas on the VEGFA Locus**

(A) Traceless delivery of SpCas9 through VESiCas. Shown is a time course analysis of SpCas9 intracellular levels by western blot analysis in HEK293T cells transduced with VESiCas or transfected with a plasmid expressing SpCas9. The reported time points correspond to the time of analysis following treatments (transduction or transfection). The western blot is representative of n = 2 independent experiments. (B) Targeted comparison of genome editing specificity using VESiCas or a plasmid expressing SpCas9 in combination with sgVEGFA site3. Shown are percentages of indel formation measured by TIDE in the VEGFA site3 locus and in two sgVEGFA site3 previously validated off-target sites (OT1 and OT3) in HEK293T cells. The dashed bars represent the TIDE background. (C) Genome-wide specificity of VESiCas targeting the VEGFA site3 locus. Shown is GUIDE-seq analysis for the sgRNA targeting VEGFA site3 locus in HEK293T cells transfected with SpCas9 or treated with VESiCas. The black square indicates on-target sites. DNA from three biological replicates was mixed before library preparation. Right: the total number of off-targets identified for the sgVEGFA site3 with SpCas9 transfection or VESiCas treatments.

of nuclease expressed by transfected plasmid were examined. SpCas9 from VESiCas was detected in target cells 6 hr after transduction and gradually disappeared within the following 18 hr (Figure 4A). Conversely, the nuclease intracellular levels produced by an expression plasmid were clearly detected 12 hr after transfection and increasingly accumulated thereafter (Figure 4A). To evaluate the extent of the off-target activity generated by SpCas9 delivered through VESiCas or by transfection, indel formation was measured at two previously validated off-target sites associated with editing of the VEGFA locus (VEGFA OT1 and OT3).<sup>13</sup> Tracking of indels by decomposition (TIDE) analysis<sup>38</sup> revealed that SpCas9 delivered through VESiCas produced higher levels of on-target activity than transfected SpCas9 while causing background levels of indels at both off-target sites (Figure 4B). Strikingly, compared with the on-target site, VESiCas produced at least 22- and 17-fold less indels at OT1 and OT3, respectively, whereas transfected SpCas9 cleaved OT1 similarly to the on-target site, and OT3 was edited just 5 times less. A deeper off-target analysis of the VEGFA locus was performed through genome-wide unbiased identification of double strand breaks (DSBs) enabled by sequencing (GUIDE-seq),<sup>39</sup> a genome-wide approach (Figure 4C). This analysis revealed that SpCas9

11 reads off-target) and a 37 times improved on/off-target ratio compared with plasmid transfection.

In conclusion, the off-target analysis performed on the VEGFA locus, a gold standard for the evaluation of SpCas9 specificity,<sup>11</sup> revealed that VESiCas produced a more specific genomic modification, which correlates with the rapid clearance of the nuclease from the target cells.

**DISCUSSION**

The CRISPR-Cas9 technology is a powerful tool for genome editing. Its translation into clinical use strongly depends on further improvements in specificity (complete abrogation of off-target activity) and delivery. These are tightly interdependent aspects of genome editing because the amount and time of Cas9 expression in recipient cells strongly correlate with the frequencies of off-target cleavages.<sup>13,14,40</sup> Moreover, persistence of Cas9 expression may generate adverse immune responses toward the modified cells *in vivo*, further reinforcing the demand for a highly controllable method of delivery.<sup>41</sup> Transient expression of Cas9 has been obtained through physical and chemical delivery methods,<sup>14,16</sup> which are not ideal for *in vivo* applications.<sup>18</sup>

Premiere tools for *in vivo* gene delivery are viral vectors, which, however, have serious limitations deriving from their potential risk of insertional mutagenesis<sup>13,21</sup> and permanent transgene expression that may increase the number of SpCas9 off-target cleavages.<sup>42</sup> Genotoxicity associated with viral integration can be partially circumvented by using non-integrating viral vectors such as those derived from AAVs).<sup>24,43</sup> Because of size limitations, SpCas9 orthologs, such as the one from *Staphylococcus aureus*,<sup>44</sup> or split-protein strategies (split-Cas9) have generally been employed with AAV vectors.<sup>45</sup> However, the separation of CRISPR elements introduces high complexity into the system, and occasional AAV integrations have been reported.<sup>43</sup> Similarly, unpredictable insertional mutagenesis reported with other non-integrating vectors, such as IDLVs, can be enhanced by nuclease activity beyond the background level.<sup>46,47</sup> Attempts to combine the advantages offered by viral delivery together with transient SpCas9 expression were recently addressed by using a self-limiting CRISPR-Cas9 lentiviral vector<sup>13</sup> and by engineering lentiviral particles containing pre-packaged SpCas9 together with a non-integrating lentiviral vector expressing the sgRNAs.<sup>25</sup> A further step toward the exploitation of viral delivery properties in a DNA-free context is the development of VLPs,<sup>26,28</sup> which have mainly been used in the past decade for vaccination approaches<sup>27</sup> and for the delivery of exogenous proteins.<sup>26,28</sup> In this study, we explored the use of lentivirus-based VLPs for the delivery of SpCas9 fused to HIV-1 Gag in the absence of a viral transfer genome. To further abandon viral elements for the production of vesicles, we exploited the fusogenic properties of VSV-G alone, which is sufficient for the delivery of protein cargos.<sup>29</sup> We discovered that VSV-G vesicles, in combination with SpCas9, were sufficiently loaded with SpCas9 protein. However, vesicles produced under standard experimental conditions using nuclear U6-based transcription for sgRNA synthesis showed poor genome-editing activity, suggesting non-sufficient amounts of incorporated sgRNA. This limitation was circumvented by favoring SpCas9 protein assembly with the sgRNA in producing cells through cytoplasmic sgRNA synthesis driven by the T7 RNA polymerase. To this end, we employed cells resistant to cytotoxicity induced by high levels of uncapped 5'-triphosphate cytoplasmic RNA, BSR-T7/5.<sup>32</sup>

A remarkable advantage offered by the VESiCas approach is the transient nature of delivered SpCas9. As demonstrated in this study, the rapid clearance of SpCas9, which decreased as soon as 12 hr after VESiCas treatment, strongly lowered the off-target activity associated with genome editing, as opposed to high levels of non-specific cleavages generated by plasmid transfection. Our data also prove that VESiCas are more efficient and less toxic in delivering SpCas9 RNPs than electroporation. In fact, our system requires less SpCas9 protein, offering a clear advantage in preventing potential adverse effects of immune responses against the edited cells.<sup>41</sup>

Eventually, VESiCas can be readily adapted to more complex genome-editing approaches, such as the use of Cas9 nickase, requiring incorporation of sgRNAs pairs; their use with other emerging RNA-guided nucleases can also be envisioned.<sup>48</sup>

Overall, the efficient and traceless delivery of CRISPR-Cas9 through the VESiCas approach represents a further advancement toward safer *in vivo* genome editing.

## MATERIALS AND METHODS

### Plasmids and Oligonucleotides

The sgRNAs for the initial experiments on VSV-G vesicle production were transcribed from a U6 promoter-driven cassette derived from pX330 (a gift from Feng Zhang, Addgene 42230)<sup>1</sup> and cloned into the pUC19 plasmid.<sup>13</sup> sgRNA oligos were cloned using a double BbsI site inserted before the sgRNA constant portion according to a previously published cloning strategy.<sup>1</sup> The Gag-SpCas9 plasmid was obtained through the fusion of the Gag coding sequence with 3×FLAG-SpCas9 encoded by the pX-SpCas9 vector.<sup>13</sup> pX-SpCas9 was obtained by removal of an NdeI fragment including the sgRNA expression cassette from pX330 and was used to express SpCas9. MinimalGag-Cas9 was assembled in pCDNA3 by subcloning the SpCas9 coding sequence from pX-SpCas9 and MinimalGag from the Δ-Zwt-p2b plasmid,<sup>36</sup> a generous gift from H.G. Gottlinger. Afterward, an additional version of both constructs was obtained by removing, through site-directed mutagenesis, a methionine in the linker peptide derived from pX-Cas9 that led to unfused SpCas9 production (Figure S4).

For VLP and VESiCas production in BSR-T7/5 cells, sgRNAs were transcribed from a pVAX-T7-sgRNA expression plasmid having a T7 promoter-driven cassette cloned into the pVAX plasmid at the NdeI site. sgRNA oligos were cloned in pVAX-T7-sgRNA using a double BsmBI site inserted before the sgRNA constant portion (a list of oligonucleotides used to clone sgRNAs is available in Table S1). pVAX-T7-sgRNA included a 5' HDV ribozyme<sup>33</sup> designed to cleave the 3' end of the sgRNA containing the T7 terminator and the ribozyme itself. The Cas9-nickase construct was obtained by inserting the D10A mutation in the SpCas9 coding sequence. The T7 RNA polymerase coding sequence was amplified from the genome of BSR-T7/5 cells and cloned in place of EGFP into the pEGFP-N1 plasmid using the HindIII/XbaI sites to obtain the pKANA-T7-RNA-Pol plasmid. Plasmids were verified by Sanger sequencing. Information regarding relevant plasmid DNA sequences produced for this manuscript can be found in the Supplemental Information.

### Cell Cultures and Transfection

BHK21-derived producing cells stably expressing T7 polymerase (BSR-T7/5) were a kind gift from Karl Conzelmann (Ludwig-Maximilians-Universität, Munich, Germany).<sup>31</sup> To select cells that retain the T7 RNA polymerase construct, the medium was supplemented with 1 mg/mL G418 (Gibco-Life Technologies). HEK293T cells were obtained from the ATCC. HEK293-EGFP cells were generated by stable transfection of pEGFP-IRES-Puro and selected with 1 μg/mL of puromycin.<sup>13</sup> BHK-21 (ATCC CCL-10), Vero (ATCC-CCL-81), HeLa (ATCC-CCL-2), and all cell lines described above were cultured in DMEM supplemented with 10% heat-inactivated fetal bovine serum (FBS), 2 mM L-glutamine, 10 U/mL penicillin, and 10 μg/mL streptomycin. J-Lat-A1 are Jurkat cells

that have been latently transduced by an HIV-1 vector encoding EGFP.<sup>49</sup> J-Lat-A1 cells were cultured in RPMI medium supplemented with 10% FBS and penicillin and streptomycin (pen/strep) antibiotics. EGFP expression was induced with 10 nM TPA (12-O-tetradecanoylphorbol-13-acetate) treatment for 24 hr. To obtain HeLa-EGFP, HeLa cells were transfected with the pEGFP-C1 plasmid (Clontech Laboratories) using FuGENE HD transfection reagent (Promega). After selection in culture medium with 400 µg/mL G418 (Life Technologies) for approximately 10 days, cells expressing high levels of EGFP were enriched by fluorescence-activated cell sorting (FACS) and propagated as a polyclonal cell population. Stock cultures of HeLa-EGFP cells (~95% EGFP-positive cells) were maintained in culture medium supplemented with 200 µg/mL G418. Transgenic human iPSCs constitutively expressing GFP were derived from a commercial human episomal iPSC line (Gibco, Thermo Fisher Scientific) originally derived from CD34+ cord blood using an EBNA-based episomal system. Human iPSC clones stably expressing copGFP under control of the ubiquitous cytomegalovirus promoter were generated by infection with the pGZ-CMV-copGFP lentiviral vector (System Biosciences). Zeocin-based clone selection was started 72 hr after infection for 7 days. Resistant colonies were manually picked, expanded clonally, and characterized for their pluripotency competence. Human iPSC lines were grown on feeder-free Geltrex-coated dishes and cultured in StemMACS iPS-Brew XF medium (Miltenyi Biotec). All cell lines were verified to be mycoplasma-free (PlasmoTest, InvivoGen).

Transfection experiments were performed in 12–24 multi-well plates with 250–1,000 ng of each plasmid using the TransIT-LT1 (Mirus) reagent according to manufacturer's instructions. Cells were collected 2–4 days after transfection or as described.

Gene substitution experiments through HDR of the EGFP-Y66S gene were performed using previously described cells and donor DNA.<sup>13</sup> Briefly 293-iY66S cells (Flp-In T-REx system, Life Technologies) were generated by Flp-mediated recombination of the pcDNA5-FRT-TO-EGFP-Y66S plasmid in cells carrying a single genomic FLP recombinase target (FRT) site and stably expressing the tetracycline repressor. 293-iY66S cells were cultured in selective medium containing 15 µg/mL blasticidin and 100 µg/mL hygromycin (Life Technologies). 293-iY66S cells were transfected in 24 multi-wells with 1 µg of pcDNA5-FRT-TO-rEGFP(1-T203K-stop) donor plasmid together with either 500 ng of pcDNA3.1 or 250 ng of pX-Cas9 and 250 ng of pUC19 plasmid encoding sgRNA<sub>EGFPBi</sub> or control sgRNA (sgCtr) using TransIT-LT1 (Mirus Bio) according to manufacturer's instructions. 16 hr after transfection with the donor plasmid, cells were washed with new medium and treated with VESiCas (1 µg Cas9). Cells were collected and analyzed 4 days after treatment. The expression of EGFP was induced by treatment with 100 ng/mL doxycycline (Cayman Chemical) for 20 hr before fluorescence measurement.

#### VSV-G/SpCas9 Vesicles, Lenti-VLPs, and VESiCas Production

For VSV-G/Cas9 vesicle production, a 100-mm dish of confluent HEK293T cells was transfected with 15 µg of pXCas9, Gag-SpCas9,

or pCDNA3-MinGag-Cas; 15 µg of the desired pUC-U6-sgRNA; and 3 µg of VSV-G plasmids using the polyethyleneimine (PEI) method.<sup>50</sup> Subsequent productions were performed in BSR-T7/5 cells using the conditions reported above, except for the pVAX-T7-sgRNA plasmid, which substituted pUC-U6-sgRNA for RNA guide expression. For Multi-VESiCas deletion experiments, 7.5 µg of each pVAX-T7-sgRNA (sg<sub>EGFP5</sub> and sg<sub>EGFPBi</sub>) targeting EGFP was used for particle production. For VESiCas-n production, 15 µg of Cas9-Nickase plasmid and 7.5 µg of each pVAX-T7-sg<sub>EGFPBi</sub> and pVAX-T7-sg<sub>EGFP3gW</sub> were used. After 12 hr of incubation, the medium was replaced with fresh complete DMEM, and 48 hr later, the supernatant was collected, centrifuged at 400 × g for 5 min, and filtered through a 0.22 µm polyethersulfone (PES) filter. VLPs and VESiCas were then concentrated and purified through a 20% sucrose cushion by ultracentrifugation for 2 hr at 150,000 × g (4°C) and suspended in suitable volumes of complete medium (DMEM, RPMI, or StemMACS iPS-Brew XF medium, according to the target cells) or 1 × PBS for mouse injections and stored at –80°C. The amount of SpCas9 or Gag-SpCas9 and MinGag-SpCas9 chimeras produced in the VSV-G vesicles was evaluated through western blot analysis using purified SpCas9 as a standard. Unless indicated, for each single transduction experiment we used vesicles containing about 1 µg of SpCas9. The reference recombinant SpCas9 protein was produced in bacteria (see below) according to Gagnon et al.<sup>51</sup> and quantified through Coomassie staining. The efficiency of SpCas9 incorporation into VESiCas was obtained through a western blot ratio of incorporated SpCas9 protein on the total amount of proteins quantified in VESiCas by Bradford assay (Bio-Rad).

#### Delivery in Target Cells

The day before transduction,  $1 \times 10^5$  HEK293T, HEK293-EGFP, HeLa-EGFP, or J-LAT-A1 cells were seeded in a 24-well plate. VESiCas and VLPs were delivered into target cells by spinoculation for 2 hr at 1,600 × g at 20°C (30 min at 1,000 × g and 24°C for human iPSCs), followed by overnight incubation at 37°C. J-Lat-A1 cells were induced by TPA (Sigma-Aldrich) and analyzed for genome editing 3 days after the last transduction or, for EGFP reduction, at least 7 days after the treatment. For *VEGFA* and *CXCR4* loci, triple transduction experiments were performed. Cells were trypsinized 24 hr after each transduction; 2/3 of cells were collected for genomic analysis and 1/3 was subcultured for following treatments, one every 48 hr. Cells were collected for final analysis 3 days after the last treatment.

#### SpCas9-sgRNA Electroporation

Recombinant SpCas9 protein was produced in bacteria according to Gagnon et al.<sup>51</sup> Briefly, the pET-28b-Cas9-His plasmid (a gift from Alex Schier, 47327) was used to express SpCas9 in *E. coli* Rosetta cells (Novagen), which were grown for 12 hr at 37°C, followed by 24 hr induction at 18°C. Purification was performed on his-tag resin (G-Biosciences), and the column was washed with 20 mM Tris (pH 8), 30 mM imidazole, and 500 mM NaCl and eluted with 20 mM Tris (pH 8), 500 mM imidazole, and 500 mM NaCl. After dialysis into 20 mM Tris, 200 mM KCl, and 10 mM MgCl<sub>2</sub>, single-use aliquots were stored at –80°C. To produce *in vitro*-transcribed

sgRNAs, we PCR-amplified pVAX-T7-sgEGFP*Bi* and pVAX-T7-sgCtr with primers T7 promoter forward (fw) and gRNA end reverse (rev) (Table S2). This PCR product, containing the T7 promoter and the complete sequence of the sgRNA, was used for *in vitro* transcription using the HiScribe T7 High Yield RNA Synthesis Kit (New England Biolabs) following the manufacturer's instructions. TRIzol (Invitrogen)-purified sgRNAs, precipitated with isopropanol and washed with 75% ethanol, were analyzed by acrylamide gel electrophoresis and quantified using a NanoDrop spectrophotometer (Thermo Fisher Scientific). Purified sgRNAs were mixed with recombinant SpCas9 immediately before electroporation by incubating 12.4  $\mu$ g of SpCas9 with 3.1  $\mu$ g of sgRNA (or as indicated with a 4:1 mass ratio between protein and RNA) in 20 mM 4-(2-hydroxyethyl)-1-piperazineethanesulfonic acid (HEPES) (pH 7.5), 150 mM KCl, 1 mM MgCl<sub>2</sub>, 10% (v/v) glycerol, and 1 mM DTT at 37°C for 10 min.  $2.5 \times 10^5$  HEK293-EGFP cells were nucleofected using the Q001 protocol in 120 mM K<sub>2</sub>HPO<sub>4</sub>/KH<sub>2</sub>PO<sub>4</sub> (pH 7.2), 15 mM MgCl<sub>2</sub>, 10 mM glucose, and 5 mM KCl using Lonza Nucleofector II. Cells were analyzed for EGFP loss 7 days after electroporation.

#### Viability Assay

48 hr following VESiCas spinoculation or RNP electroporation, HEK293-EGFP cells were collected, and the viability was measured with the Vybrant MTT Cell Proliferation Assay Kit (Thermo Fisher Scientific) according to the manufacturer's instructions.

#### Detection of SpCas9-Induced Mutations

EGFP expression was analyzed with the Invitrogen Tali image-based cytometer. In the comparative analysis with electroporated RNPs, analysis of EGFP expressing cells was performed by FACS (FACSCanto, BD Biosciences). To detect indels in the *CXCR4* and *VEGFA* loci, genomic DNA was isolated using the DNeasy Blood & Tissue Kit (QIAGEN). PCRs on purified genomic DNA were performed using Phusion High-Fidelity DNA polymerase (Thermo Fisher Scientific). Samples were amplified using the oligonucleotides listed in Table S2. Purified PCR products were analyzed by sequencing and applying the TIDE tool.<sup>38</sup> Detection of the deletion in the *EGFP* locus after Multi-VESiCas treatment was revealed by PCR amplification using oligonucleotides *EGFP* fw and *EGFP* rev.

#### GUIDE-Seq

$2 \times 10^5$  HEK293T cells were transfected with 750 ng of SpCas9-expressing plasmid together with 250 ng of *VEGFA site3* sgRNA-coding plasmid or an empty pUC19 plasmid, 10 pmol of the bait double-stranded oligodeoxynucleotide (dsODN) containing phosphorothioate bonds at both ends (designed according to the original GUIDE-seq protocol<sup>39</sup>), and 50 ng of a pEGFP-IRES-Puro plasmid expressing both EGFP and the puromycin resistance gene. VESiCas targeting *VEGFA site3* were delivered by spinoculation 6 hr following transfection of dsODN and pEGFP-IRES-Puro coding plasmids. The following day, cells were trypsinized and replated. The procedure was repeated every 48 hr. After the last treatment, cells were detached and selected with 2  $\mu$ g/mL of puromycin for 48 hr. Cells were then collected, and genomic DNA was extracted using the DNeasy Blood

and Tissue Kit (QIAGEN) following the manufacturer's instructions and sheared to an average length of 500 bp with the Bioruptor Pico sonication device (Diagenode). Library preparations were performed with the original adapters and primers according to previous work.<sup>39</sup> Libraries were quantified with the Qubit dsDNA High Sensitivity Assay Kit (Invitrogen) and sequenced with the MiSeq sequencing system (Illumina) using an Illumina Miseq Reagent kit V2, 300 cycles ( $2 \times 150$  bp paired end). Raw sequencing data (FASTQ files) were analyzed using the GUIDE-seq computational pipeline.<sup>39</sup> After demultiplexing, putative PCR duplicates were consolidated into single reads. Consolidated reads were mapped to the human reference genome GrCh37 using BWA-MEM37; reads with a mapping quality lower than 50 were filtered out. Upon identification of the genomic regions integrating dsODNs in aligned data, off-target sites were retained when at most eight mismatches against the target were present and absent in the background controls. Visualization of aligned off-target sites is available as a color-coded sequence grid. Off-target sites detected are listed in Table S3.

#### Western Blots

Collected cells or supernatants containing VSV-G vesicles were lysed in NEHN buffer (20 mM HEPES [pH 7.5], 300 mM NaCl, 0.5% NP40, 1 mM EDTA, and 20% glycerol) supplemented with 1% of protease inhibitor cocktail (Pierce). Protein extracts were separated by SDS-PAGE using the PageRuler Plus Protein Standards as the standard molecular mass markers (Thermo Fisher Scientific). After electrophoresis, samples were transferred onto 0.22  $\mu$ m PVDF membranes (GE Healthcare). The membranes were incubated with mouse anti-FLAG (Sigma) for detecting Gag-Cas9, MinGag-Cas9, and SpCas9 and mouse anti- $\alpha$ -tubulin (Sigma) and with the appropriate horseradish peroxidase (HRP)-conjugated goat anti-mouse (Kirkegaard & Perry Laboratories [KPL]) secondary antibody for enhanced chemiluminescence (ECL) detection. The Guide-it Cas9 monoclonal antibody (clone TG8C1) (Clontech) was used to quantify SpCas9 by western blotting using recombinant SpCas9 as a reference. Images were acquired and bands were quantified using the UVitec Alliance detection system.

#### In Vivo Delivery of VESiCas

Animal care and treatments were conducted in conformity with institutional guidelines in compliance with national and international laws and policies (European Economic Community [EEC] Council Directive 86/609, OJL 358, December 12, 1987 and D.lgs 116/92) upon approval by the International Centre for Genetic Engineering and Biotechnology (ICGEB) Ethical Committee for Animal Experimentation and by the Italian Ministry of Health. Transgenic mice (males) expressing EGFP (C57BL/6-Tg(CAG-EGFP)10sb/J from The Jackson Laboratory) on post-natal day 5 were anesthetized by hypothermia on ice for  $\sim 3$ –5 min, placing a gauze below the pup to avoid direct contact with ice. A transverse skin incision across the lower half of the chest was performed using small scissors, followed by gentle separation of the skin from underlying muscle by using blunt dissection. A lateral tracheotomy was created by making a small incision at the fourth intercostal space to visualize



the heart. VesiCas (5  $\mu$ L, corresponding to 4  $\mu$ g of SpCas9) carrying sgCtr or a guide targeting *EGFP* (sg*EGFPBi*) were injected into the left ventricular anterior wall using a 31G needle ( $n = 5$  per group). The ribs and the skin were sutured together using an 8-0 nonabsorbable prolene suture to seal the chest wall incision. The neonates were warmed rapidly under a heat lamp for several minutes until recovery and re-introduced to the mother. After 10 days, the hearts were collected, fixed in 4% paraformaldehyde, and snap-frozen in isopentane and liquid nitrogen for fluorescence microscopy analysis.

### Immunofluorescence and Image Analysis

Frozen sections were washed 3 times in PBS, permeabilized in 0.5% Triton X-100 for 30 min, and blocked in 10% goat serum for 1 hr. Sections were stained overnight at 4°C with anti-sarcomeric  $\alpha$ -actinin antibodies (Abcam) 1:100 in 5% goat serum. After 2 washing steps of 5 min in 0.5% Triton X-100 at room temperature, sections were incubated 1 hr in 1:200 anti-mouse secondary antibody conjugated to Alexa Fluor 594 (Life Technologies) in 10% goat serum for 45 min at room temperature. Nuclei were stained with DAPI solution (Sigma). Quantification of EGFP-positive cardiomyocytes was performed on 10 $\times$  images of coronal heart sections, corresponding to a 2 mm<sup>2</sup> area of the left ventricular anterior wall, surrounding the injection site. At least 3 different sections and 10 images per animal were used for the quantification (50 images per group). Data are expressed as the percentage of EGFP-positive cardiomyocytes over the total number of  $\alpha$ -actinin-labeled cardiomyocytes.

### Data Availability

All relevant data are available from the authors upon request.

### SUPPLEMENTAL INFORMATION

Supplemental Information includes six figures, three tables, and sequences and can be found with this article online at <https://doi.org/10.1016/j.omtn.2018.05.010>.

### AUTHOR CONTRIBUTIONS

C.M., G.P., A. Casini, G.M., G.M.F., and I.Z. performed the experiments in cell lines. C.M., G.P., and A. Casini designed the experiments and collected and analyzed the data. C.M., G.P., A. Casini, and A.C. conceived and designed the study. L.C. contributed to human iPSC experiments. F.A. and O.R.B. contributed in setting up the producing system and provided reagents. S.Z., L.Z., and M.G. contributed to the experiments in the mouse model. A.C. was responsible for the coordination of the study. All authors read, corrected, and approved the final manuscript.

### CONFLICTS OF INTEREST

The technology reported in this manuscript is under consideration for patent filing.

### ACKNOWLEDGMENTS

We thank K. Conzelmann (Ludwig-Maximilians-Universität, Munich, Germany) for the BSR-T7/5 cell line and the LaBSSAH – CIBIO Next Generation Sequencing Facility of the University Trento for

sequencing samples. The plasmid encoding a minimal HIV-1 Gag fused to RSV p2b (D-Zwt-p2b) was a kind gift from Heinrich Gottlinger. G.P.'s fellowship was supported by the CARITRO Foundation. This work was supported by intramural funding from the University of Trento.

### REFERENCES

- Cong, L., Ran, F.A., Cox, D., Lin, S., Barretto, R., Habib, N., Hsu, P.D., Wu, X., Jiang, W., Marraffini, L.A., and Zhang, F. (2013). Multiplex genome engineering using CRISPR/Cas systems. *Science* 339, 819–823.
- Jinek, M., East, A., Cheng, A., Lin, S., Ma, E., and Doudna, J. (2013). RNA-programmed genome editing in human cells. *eLife* 2, e00471.
- Ye, L., Wang, J., Beyer, A.L., Teque, F., Cradick, T.J., Qi, Z., Chang, J.C., Bao, G., Muench, M.O., Yu, J., et al. (2014). Seamless modification of wild-type induced pluripotent stem cells to the natural CCR5 $\Delta$ 32 mutation confers resistance to HIV infection. *Proc. Natl. Acad. Sci. USA* 111, 9591–9596.
- Schumann, K., Lin, S., Boyer, E., Simeonov, D.R., Subramaniam, M., Gate, R.E., Haliburton, G.E., Ye, C.J., Bluestone, J.A., Doudna, J.A., and Marson, A. (2015). Generation of knock-in primary human T cells using Cas9 ribonucleoproteins. *Proc. Natl. Acad. Sci. USA* 112, 10437–10442.
- Liao, H.-K., Gu, Y., Diaz, A., Marlett, J., Takahashi, Y., Li, M., Suzuki, K., Xu, R., Hishida, T., Chang, C.J., et al. (2015). Use of the CRISPR/Cas9 system as an intracellular defense against HIV-1 infection in human cells. *Nat. Commun.* 6, 6413.
- Varshney, G.K., Pei, W., LaFave, M.C., Idol, J., Xu, L., Gallardo, V., Carrington, B., Bishop, K., Jones, M., Li, M., et al. (2015). High-throughput gene targeting and phenotyping in zebrafish using CRISPR/Cas9. *Genome Res.* 25, 1030–1042.
- Amabile, A., Migliara, A., Capasso, P., Biffi, M., Cittaro, D., Naldini, L., and Lombardo, A. (2016). Inheritable Silencing of Endogenous Genes by Hit-and-Run Targeted Epigenetic Editing. *Cell* 167, 219–232.e14.
- Diao, Y., Li, B., Meng, Z., Jung, I., Lee, A.Y., Dixon, J., Maliskova, L., Guan, K.L., Shen, Y., and Ren, B. (2016). A new class of temporarily phenotypic enhancers identified by CRISPR/Cas9-mediated genetic screening. *Genome Res.* 26, 397–405.
- Klann, T.S., Black, J.B., Chellappan, M., Safi, A., Song, L., Hilton, I.B., Crawford, G.E., Reddy, T.E., and Gersbach, C.A. (2017). CRISPR-Cas9 epigenome editing enables high-throughput screening for functional regulatory elements in the human genome. *Nat. Biotechnol.* 35, 561–568.
- Romanel, A., Garritano, S., Stringa, B., Blattner, M., Dalfovo, D., Chakravarty, D., Soong, D., Cotter, K.A., Petris, G., Dhingra, P., et al. (2017). Inherited determinants of early recurrent somatic mutations in prostate cancer. *Nat. Commun.* 8, 48.
- Casini, A., Olivieri, M., Petris, G., Montagna, C., Reginato, G., Maule, G., Lorenzin, F., Prandi, D., Romanel, A., Demichelis, F., et al. (2018). A highly specific SpCas9 variant is identified by in vivo screening in yeast. *Nat. Biotechnol.* 36, 265–271.
- Tsai, S.Q., and Joung, J.K. (2016). Defining and improving the genome-wide specificities of CRISPR-Cas9 nucleases. *Nat. Rev. Genet.* 17, 300–312.
- Petris, G., Casini, A., Montagna, C., Lorenzin, F., Prandi, D., Romanel, A., Zasso, J., Conti, L., Demichelis, F., and Cereseto, A. (2017). Hit and go CAS9 delivered through a lentiviral based self-limiting circuit. *Nat. Commun.* 8, 15334.
- Kim, S., Kim, D., Cho, S.W., Kim, J., and Kim, J.-S. (2014). Highly efficient RNA-guided genome editing in human cells via delivery of purified Cas9 ribonucleoproteins. *Genome Res.* 24, 1012–1019.
- Ramakrishna, S., Kwaku Dad, A.B., Beloor, J., Gopalappa, R., Lee, S.K., and Kim, H. (2014). Gene disruption by cell-penetrating peptide-mediated delivery of Cas9 protein and guide RNA. *Genome Res.* 24, 1020–1027.
- Zuris, J.A., Thompson, D.B., Shu, Y., Guilinger, J.P., Bessen, J.L., Hu, J.H., Maeder, M.L., Joung, J.K., Chen, Z.Y., and Liu, D.R. (2015). Cationic lipid-mediated delivery of proteins enables efficient protein-based genome editing in vitro and in vivo. *Nat. Biotechnol.* 33, 73–80.
- Mout, R., Ray, M., Yesilbag Tonga, G., Lee, Y.W., Tay, T., Sasaki, K., and Rotello, V.M. (2017). Direct Cytosolic Delivery of CRISPR/Cas9-Ribonucleoprotein for Efficient Gene Editing. *ACS Nano* 11, 2452–2458.

18. Mout, R., Ray, M., Lee, Y.-W., Scaletti, F., and Rotello, V.M. (2017). In Vivo Delivery of CRISPR/Cas9 for Therapeutic Gene Editing: Progress and Challenges. *Bioconjug. Chem.* 28, 880–884.
19. Long, C., Amoasii, L., Mireault, A.A., McAnally, J.R., Li, H., Sanchez-Ortiz, E., Bhattacharyya, S., Shelton, J.M., Bassel-Duby, R., and Olson, E.N. (2016). Postnatal genome editing partially restores dystrophin expression in a mouse model of muscular dystrophy. *Science* 351, 400–403.
20. Yang, Y., Wang, L., Bell, P., McMenamin, D., He, Z., White, J., Yu, H., Xu, C., Morizono, H., Musunuru, K., et al. (2016). A dual AAV system enables the Cas9-mediated correction of a metabolic liver disease in newborn mice. *Nat. Biotechnol.* 34, 334–338.
21. Chick, H.E., Nowrouzi, A., Fronza, R., McDonald, R.A., Kane, N.M., Alba, R., Delles, C., Sessa, W.C., Schmidt, M., Thrasher, A.J., and Baker, A.H. (2012). Integrase-deficient lentiviral vectors mediate efficient gene transfer to human vascular smooth muscle cells with minimal genotoxic risk. *Hum. Gene Ther.* 23, 1247–1257.
22. Nakai, H., Yant, S.R., Storm, T.A., Fuess, S., Meuse, L., and Kay, M.A. (2001). Extrachromosomal recombinant adeno-associated virus vector genomes are primarily responsible for stable liver transduction in vivo. *J. Virol.* 75, 6969–6976.
23. Lombardo, A., Genovese, P., Beausejour, C.M., Colleoni, S., Lee, Y.L., Kim, K.A., Ando, D., Urnov, F.D., Galli, C., Gregory, P.D., et al. (2007). Gene editing in human stem cells using zinc finger nucleases and integrase-defective lentiviral vector delivery. *Nat. Biotechnol.* 25, 1298–1306.
24. Zacchigna, S., Zentilin, L., and Giacca, M. (2014). Adeno-associated virus vectors as therapeutic and investigational tools in the cardiovascular system. *Circ. Res.* 114, 1827–1846.
25. Choi, J.G., Dang, Y., Abraham, S., Ma, H., Zhang, J., Guo, H., Cai, Y., Mikkelsen, J.G., Wu, H., Shankar, P., and Manjunath, N. (2016). Lentivirus pre-packed with Cas9 protein for safer gene editing. *Gene Ther.* 23, 627–633.
26. Voelkel, C., Galla, M., Maetzig, T., Warlich, E., Kuehle, J., Zychlinski, D., Bode, J., Cantz, T., Schambach, A., and Baum, C. (2010). Protein transduction from retroviral Gag precursors. *Proc. Natl. Acad. Sci. USA* 107, 7805–7810.
27. Ramqvist, T., Andreasson, K., and Dalianis, T. (2007). Vaccination, immune and gene therapy based on virus-like particles against viral infections and cancer. *Expert Opin. Biol. Ther.* 7, 997–1007.
28. Kaczmarczyk, S.J., Sitaraman, K., Young, H.A., Hughes, S.H., and Chatterjee, D.K. (2011). Protein delivery using engineered virus-like particles. *Proc. Natl. Acad. Sci. U.S.A.* 108, 16998–17003.
29. Mangeot, P.-E., Dollet, S., Girard, M., Ciancia, C., Joly, S., Peschanski, M., and Lotteu, V. (2011). Protein transfer into human cells by VSV-G-induced nanovesicles. *Mol. Ther.* 19, 1656–1666.
30. Kim, K., Park, S.W., Kim, J.H., Lee, S.H., Kim, D., Koo, T., Kim, K.E., Kim, J.H., and Kim, J.S. (2017). Genome surgery using Cas9 ribonucleoproteins for the treatment of age-related macular degeneration. *Genome Res.* 27, 419–426.
31. Buchholz, U.J., Finke, S., and Conzelmann, K.K. (1999). Generation of bovine respiratory syncytial virus (BRSV) from cDNA: BRSV NS2 is not essential for virus replication in tissue culture, and the human RSV leader region acts as a functional BRSV genome promoter. *J. Virol.* 73, 251–259.
32. Habjan, M., Penski, N., Spiegel, M., and Weber, F. (2008). T7 RNA polymerase-dependent and -independent systems for cDNA-based rescue of Rift Valley fever virus. *J. Gen. Virol.* 89, 2157–2166.
33. Nissim, L., Perli, S.D., Fridkin, A., Perez-Pinera, P., and Lu, T.K. (2014). Multiplexed and programmable regulation of gene networks with an integrated RNA and CRISPR/Cas toolkit in human cells. *Mol. Cell* 54, 698–710.
34. Kim, D.-H., Longo, M., Han, Y., Lundberg, P., Cantin, E., and Rossi, J.J. (2004). Interferon induction by siRNAs and ssRNAs synthesized by phage polymerase. *Nat. Biotechnol.* 22, 321–325.
35. Pichlmair, A., Schulz, O., Tan, C.P., Näsund, T.I., Liljeström, P., Webe, F., and Reis e Sousa, C. (2006). RIG-I-mediated antiviral responses to single-stranded RNA bearing 5'-phosphates. *Science* 314, 997–1001.
36. Accola, M.A., Strack, B., and Göttlinger, H.G. (2000). Efficient particle production by minimal Gag constructs which retain the carboxy-terminal domain of human immunodeficiency virus type 1 capsid-p2 and a late assembly domain. *J. Virol.* 74, 5395–5402.
37. Ran, F.A., Hsu, P.D., Lin, C.Y., Gootenberg, J.S., Konermann, S., Trevino, A.E., Scott, D.A., Inoue, A., Matoba, S., Zhang, Y., and Zhang, F. (2013). Double nicking by RNA-guided CRISPR Cas9 for enhanced genome editing specificity. *Cell* 154, 1380–1389.
38. Brinkman, E.K., Chen, T., Amendola, M., and van Steensel, B. (2014). Easy quantitative assessment of genome editing by sequence trace decomposition. *Nucleic Acids Res.* 42, e168.
39. Tsai, S.Q., Zheng, Z., Nguyen, N.T., Liebers, M., Topkar, V.V., Thapar, V., Wyvekens, N., Khayter, C., Iafate, A.J., Le, L.P., et al. (2015). GUIDE-seq enables genome-wide profiling of off-target cleavage by CRISPR-Cas nucleases. *Nat. Biotechnol.* 33, 187–197.
40. Fu, Y., Foden, J.A., Khayter, C., Maeder, M.L., Reyon, D., Joung, J.K., and Sander, J.D. (2013). High-frequency off-target mutagenesis induced by CRISPR-Cas nucleases in human cells. *Nat. Biotechnol.* 31, 822–826.
41. Chew, W.L., Tabebordbar, M., Cheng, J.K., Mali, P., Wu, E.Y., Ng, A.H., Zhu, K., Wagers, A.J., and Church, G.M. (2016). A multifunctional AAV-CRISPR-Cas9 and its host response. *Nat. Methods* 13, 868–874.
42. Nelson, C.E., and Gersbach, C.A. (2016). Engineering Delivery Vehicles for Genome Editing. *Annu. Rev. Chem. Biomol. Eng.* 7, 637–662.
43. Deyle, D.R., and Russell, D.W. (2009). Adeno-associated virus vector integration. *Curr. Opin. Mol. Ther.* 11, 442–447.
44. Friedland, A.E., Baral, R., Singhal, P., Loveluck, K., Shen, S., Sanchez, M., Marco, E., Gotta, G.M., Maeder, M.L., Kennedy, E.M., et al. (2015). Characterization of *Staphylococcus aureus* Cas9: a smaller Cas9 for all-in-one adeno-associated virus delivery and paired nickase applications. *Genome Biol.* 16, 257.
45. Truong, D.-J.J., Kühner, K., Kühn, R., Werfel, S., Engelhardt, S., Wurst, W., and Ortiz, O. (2015). Development of an intein-mediated split-Cas9 system for gene therapy. *Nucleic Acids Res.* 43, 6450–6458.
46. Gabriel, R., Lombardo, A., Arens, A., Miller, J.C., Genovese, P., Kaepfel, C., Nowrouzi, A., Bartholomae, C.C., Wang, J., Friedman, G., et al. (2011). An unbiased genome-wide analysis of zinc-finger nuclease specificity. *Nat. Biotechnol.* 29, 816–823.
47. Wang, X., Wang, Y., Wu, X., Wang, J., Wang, Y., Qiu, Z., Chang, T., Huang, H., Lin, R.J., and Yee, J.K. (2015). Unbiased detection of off-target cleavage by CRISPR-Cas9 and TALENs using integrase-defective lentiviral vectors. *Nat. Biotechnol.* 33, 175–178.
48. Komor, A.C., Badran, A.H., and Liu, D.R. (2017). CRISPR-Based Technologies for the Manipulation of Eukaryotic Genomes. *Cell* 168, 20–36.
49. Jordan, A., Bisgrove, D., and Verdin, E. (2003). HIV reproducibly establishes a latent infection after acute infection of T cells in vitro. *EMBO J.* 22, 1868–1877.
50. Casini, A., Olivieri, M., Vecchi, L., Burrone, O.R., and Cereseto, A. (2015). Reduction of HIV-1 infectivity through endoplasmic reticulum-associated degradation-mediated Env depletion. *J. Virol.* 89, 2966–2971.
51. Gagnon, J.A., Valen, E., Thyme, S.B., Huang, P., Akhmetova, L., Pauli, A., Montague, T.G., Zimmerman, S., Richter, C., and Schier, A.F. (2014). Efficient mutagenesis by Cas9 protein-mediated oligonucleotide insertion and large-scale assessment of single-guide RNAs. *PLoS ONE* 9, e98186.

**OMTN, Volume 12**

## **Supplemental Information**

### **VSV-G-Enveloped Vesicles for Traceless**

#### **Delivery of CRISPR-Cas9**

**Claudia Montagna, Gianluca Petris, Antonio Casini, Giulia Maule, Gian Marco Franceschini, Ilaria Zanella, Luciano Conti, Francesca Arnoldi, Oscar R. Burrone, Lorena Zentilin, Serena Zacchigna, Mauro Giacca, and Anna Cerese**

# SUPPLEMENTARY MATERIALS

## FIGURES

### Figure S1

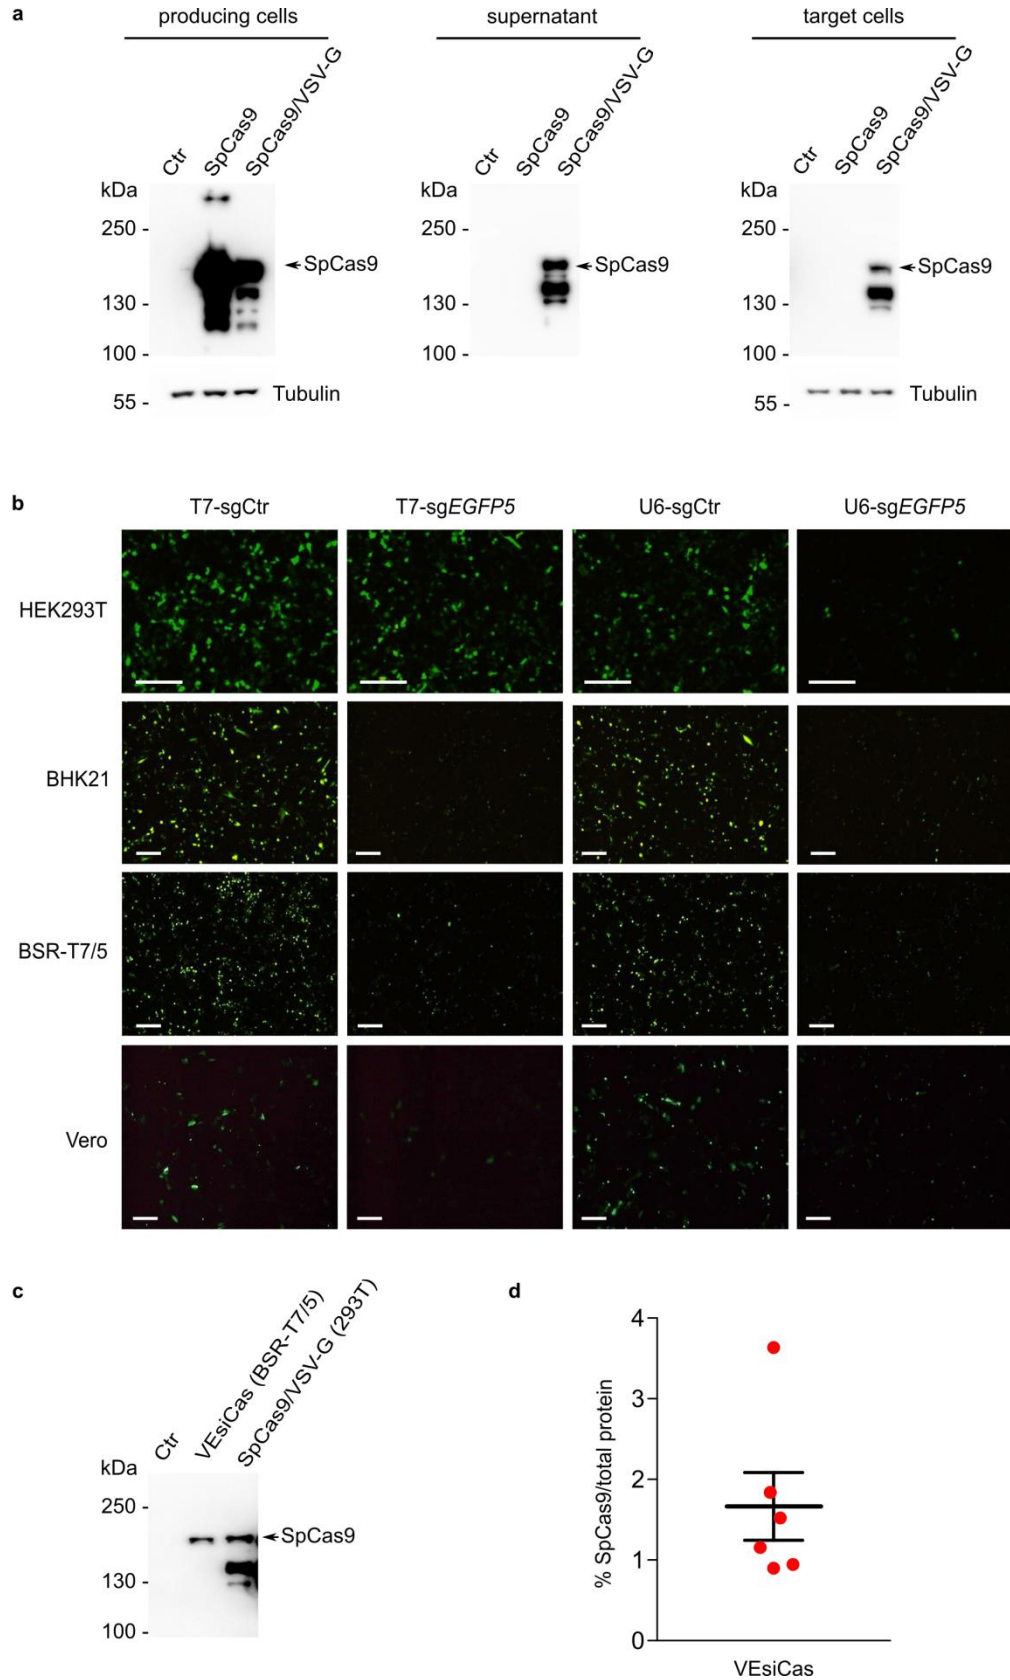

**Figure S1. Development of VSV-G Enveloped vesicles for SpCas9-sgRNA delivery.** (a) SpCas9/VSV-G vesicles production and delivery in HEK293T cells. Western blot analysis of SpCas9 expression in cell extracts of producing cells (left panel), in the supernatant of producing cells (middle panel) and in target cells 6 hours post transduction (right panel). Ctr corresponds to cells transfected with an empty control plasmid, SpCas9 corresponds to cells over-expressing SpCas9 and sgRNA (*sgEGFP5*), SpCas9/VSV-G corresponds to cells over-expressing SpCas9, *sgEGFP5* and VSV-G. Western blot is representative of n=2 independent experiments. (b) *EGFP* disruption assay in different cell lines using a U6 or T7 promoter sgRNA expression systems. Fluorescence microscopy images obtained from HEK293T, BHK21, BSR-T7/5 (a BHK21 clone stably expressing the T7 RNA polymerase) and Vero cell lines transfected with *EGFP* and SpCas9 expression plasmids together with plasmids expressing either *EGFP*-targeting (*sgEGFP5*) or non-targeting (*sgCtr*) sgRNAs from a U6 or a T7 promoter, as indicated. All cells but BSR-T7/5 were also co-transfected with a plasmid expressing the T7 RNA polymerase. *EGFP* knock-out was detected with variable intensity in all cell lines expressing sgRNAs (*sgEGFP5*) driven by the U6 promoter (right panels). Conversely, the sgRNA driven by the T7 RNA Polymerase system was able to induce *EGFP* knock-out only in permissive cells (BHK-21, BSR-T7/5 and Vero cells) but not in HEK293T cells. Scale bar: 100  $\mu$ m. Data are representative of n=2 independent experiments. (c) Western blot analysis of SpCas9 detected in the supernatant of BSR-T7/5 (VEsiCas) or HEK293T producing cells (SpCas9/VSV-G). The gel was loaded with similar amounts of SpCas9 protein. Western blots were developed with anti-SpCas9 or anti-tubulin antibodies. Western blot is representative of n=2 independent experiments. (d) Efficiency of SpCas9 incorporation into VEsiCas. The dot plot shows the percentage of SpCas9 protein over the total amount of protein content in VEsiCas (mean  $\pm$  s.e.m. of n=6 independent experiments).

**Figure S2**

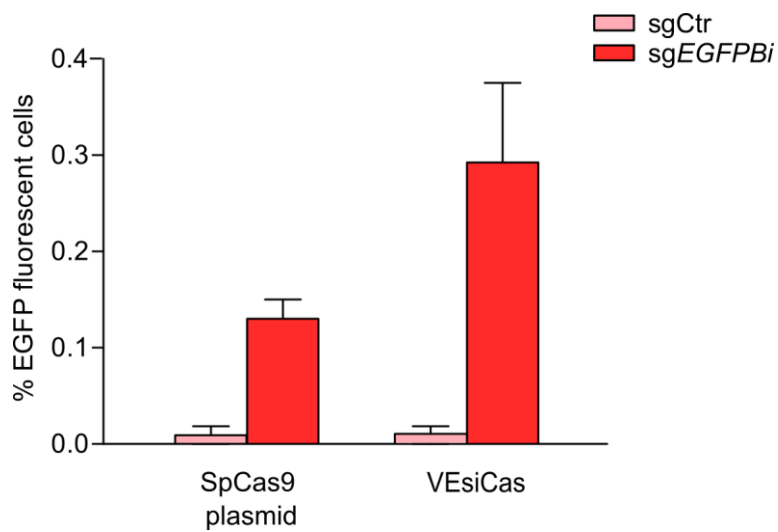

**Figure S2. Gene substitution of EGFP-Y66S gene mediated by VEsCas through homology-directed repair (HDR).** Percentage of fluorescent 293-iY66S cells obtained after transfection with a donor DNA plasmid (carrying a non-fluorescent fragment of wt-EGFP) and SpCas9-sgRNA delivery through either plasmid co-transfection or VEsCas transduction. HDR efficiencies using targeting (*EGFPBi*) or non-targeting (Ctr) sgRNAs are indicated. Data presented as mean  $\pm$  s.e.m. for n=2 independent experiments.

**Figure S3**

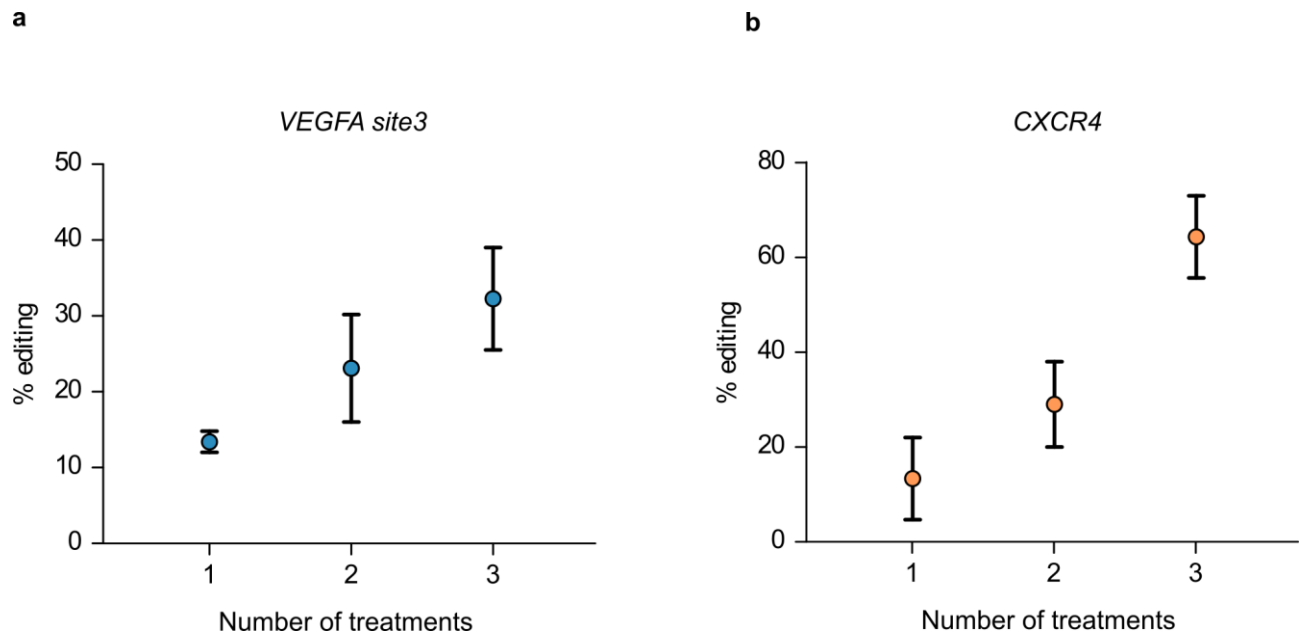

**Figure S3. Editing activity by VESiCas after multiple treatments.** (a) *VEGFA site3* and (b) *CXCR4* loci edited by VESiCas delivering SpCas9/sgrRNA complexes in HEK293 cells after the indicated number of treatments performed at 48 hours distance. The percentage of indels was analyzed by TIDE. Data presented as mean  $\pm$  s.e.m. for n=3 independent experiments.

**Figure S4**

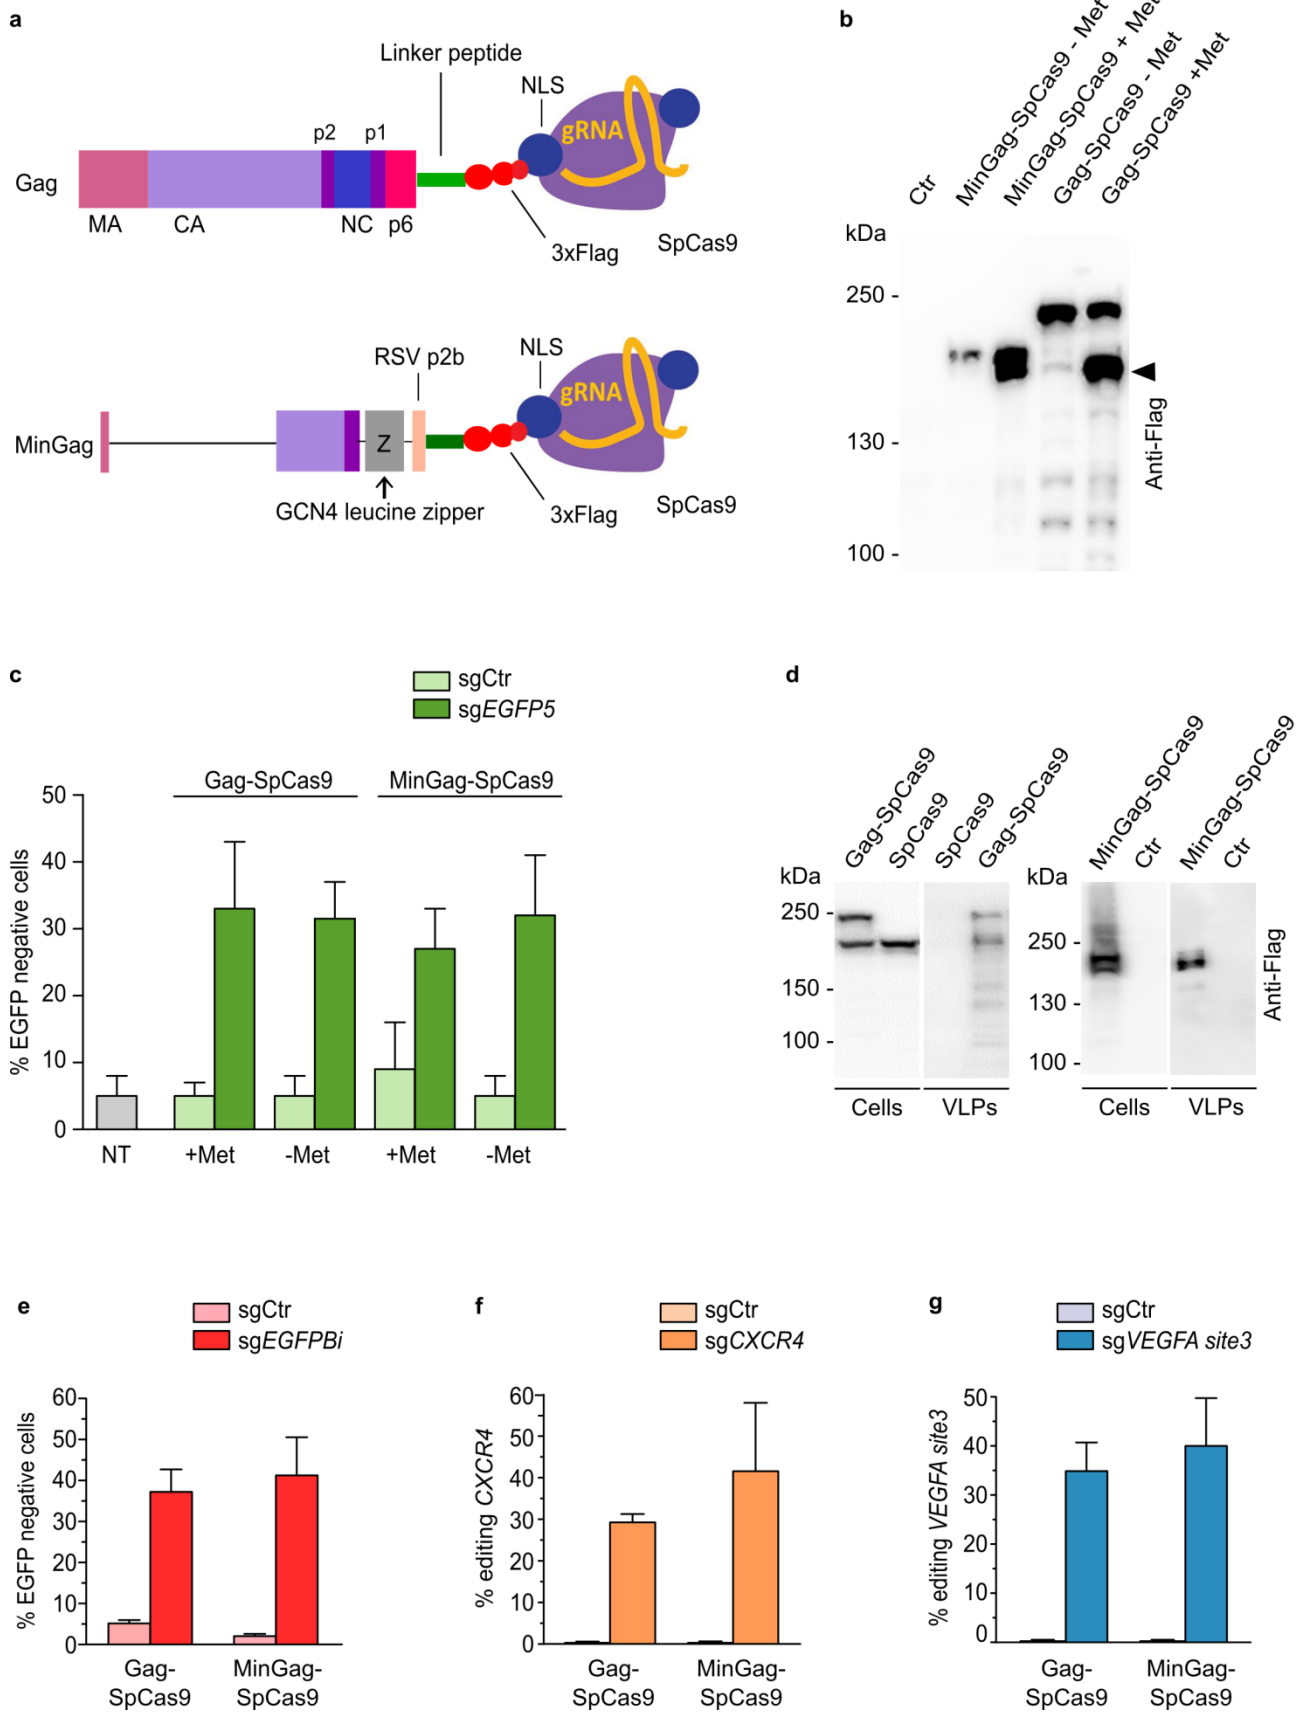



**Figure S4. Lentiviral-based viral-like particles (lenti-VLPs) for SpCas9 delivery.** (a) Scheme of the Gag-SpCas9 and MinimalGag-SpCas9 (MinGag-SpCas9) chimeras. The domains of Gag, Matrix (MA), Capsid (CA), Nucleocapsid (NC) and peptides p1, p2 and p6, are indicated. A linker peptide separates Gag from SpCas9. The position of the nuclear localization signals (NLS) and the 3xFLAG-tag are indicated. MinGag-SpCas9 fusion includes the N-terminal myristoylation signal of MA, the C-terminal part of CA and the p2 peptide. The NC was substituted with the GCN4 leucine zipper domain (Z) to maintain particle assembly. The RSV p2b peptide substitutes p6 for particle formation. (b) Western blot analysis of Gag-SpCas9 and MinGag-SpCas9. Cells were transfected with plasmid encoding Gag-SpCas9 and MinGag-SpCas9 either containing (+Met) or not (-Met) a methionine between the FLAG and the linker peptide. The arrowhead indicates free SpCas9 probably generated by translation starting from the internal Met. Ctr corresponds to cells transfected with an empty control plasmid. Western blot is representative of n=2 independent experiments. (c) Activity of Gag-SpCas9 and MinGag-SpCas9 chimeras in *EGFP* disruption assay. HEK293-EGFP cells were transfected with plasmids expressing Gag-SpCas9 or MinGag-SpCas9 with or without the methionine between the FLAG and the linker peptide. Cells were also co-transfected with *sgEGFP5* or *sgCtr*. NT = not treated. Data presented as mean  $\pm$  s.e.m. for n=2 independent experiments. (d) Western blot analysis of producing cells (Cells) and derived supernatants (VLPs) after overexpression of SpCas9, Gag-SpCas9 or MinGag-SpCas9 as indicated. Ctr corresponds to cells transfected with an empty control plasmid. Western blot is representative of n=2 independent experiments. (e-g) Genome editing with lenti-VLPs. Editing activity induced by VSV-G-decorated Gag-SpCas9 or MinGag-SpCas9 lenti-VLPs towards (e) the EGFP (percentage of EGFP negative cells), (f) the *CXCR4* or (g) the *VEGFA site3* loci in HEK293T cells. The percentage of indels was analyzed by TIDE. Data presented as mean  $\pm$  s.e.m. for n=2 independent experiments.

**Figure S5**

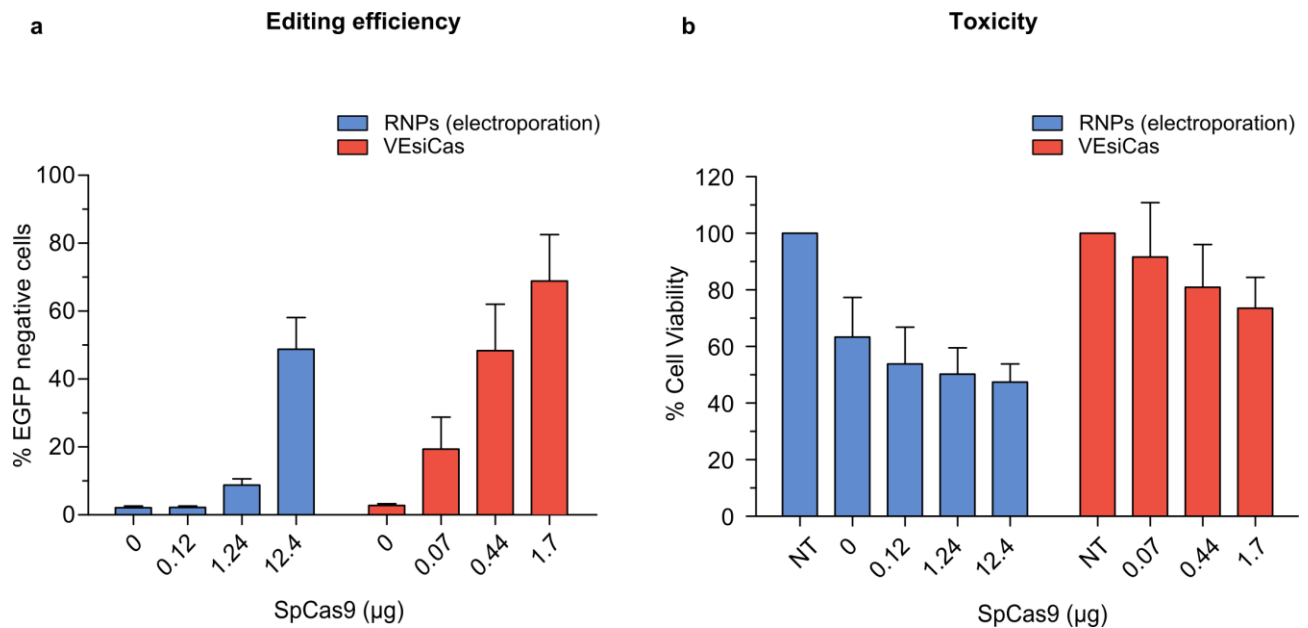

**Figure S5. Comparative analysis of editing efficiency and cell toxicity obtained with VEsiCas and SpCas9-sgRNA RNPs electroporation.** (a) *EGFP* disruption assay in HEK293-EGFP cells treated with scalar amounts of SpCas9 delivered through VEsiCas or RNPs electroporation. Both RNPs and VEsiCas were loaded with the same sgRNA (*sgEGFPB1*) transcribed by T7 RNA Polymerase either *in vitro* or in BSR-T7/5 cells respectively. (b) Toxicity of VEsiCas compared to RNPs delivered by electroporation. The bar graph shows the percentage of cell viability normalized to untreated cells (NT) 48 hours following delivery different amount of SpCas9 by electroporation or VEsiCas. Data reported as mean  $\pm$  s.e.m. of n=3 independent experiments.

**Figure S6**

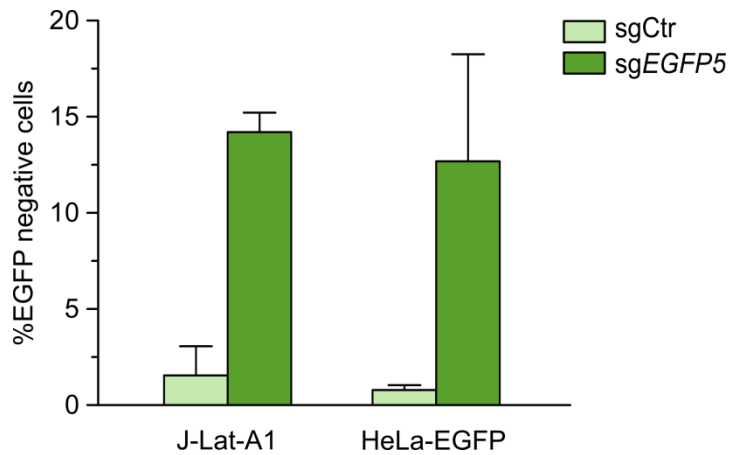

**Figure S6. VEsCas mediated *EGFP* knock-out in J-Lat-A1 and HeLa cells using VEsCas.**

J-Lat-A1 and HeLa stably expressing EGFP were treated with VEsCas carrying *EGFP* targeting (sg*EGFP5*) or control (sgCtrl) sgRNAs. The graph reports the percentages of non-fluorescent cells seven days following treatment (mean  $\pm$  s.e.m. of n=2 independent experiments).

## SEQUENCES

### pVAX-T7-sgRNA sequence

GGTACCTAATACGACTCACTATAGGAGACGGATTGACGTCTCTGTTTAAGAGCTATGCTGGAAACA  
GCATAGCAAGTTTAAATAAGGCTAGTCCGTTATCAACTTGAAAAAGTGGCACCGAGTCGGTGCT  
**TGGGTCGGCATGGCATCTCCACCTCCTCGCGGTCCGACCTGGGCATCCGAAGGAGGACGTCGTCCACTCG**  
**GATGGCTAAGGGAGAGCTCGGATCCGGCTGCTAACAAAGCCCGAAAGGAAGCTGAGTTGGCTGCTGCCAC**  
**CGCTGAGCAATAACTAGCATAACCCCTTGGGGCCTCTAACGGGTCTTGAGGGGTTTTTTGCTGAAAGGAG**  
**GAACTATATCCGGATCGAGATCC**

T7 promoter, protospacer, sgRNA-optimised scaffold, HDV ribozyme, T7 terminator.

**pVAX-T7-sgRNA sequence.** BsmBI restriction sites to clone protospacer oligonucleotides are underlined, sgRNA sequence is in bold.

## pX-Gag-SpCas9 sequence

ATGGGTGCGAGAGCGTCGGTATTAAGCGGGGGAGAATTAGATCGATGGGAAAAAATTCGGTTAAGGCCAG  
GGGAAAGAAGAAGTACAAGCTAAAGCACATCGTATGGGCAAGCAGGGAGCTAGAACGATTCGCAGTTAA  
TCCTGGCCTGTTAGAAACATCAGAAGGCTGTAGACAAATACTGGGACAGCTACAACCATCCCTTCAGACAG  
GATCAGAGGAGCTTCGATCACTATACAACACAGTAGCAACCCTCTATTGTGTGCACCAGCGGATCGAGATC  
AAGGACACCAAGGAAGCTTTAGACAAGATAGAGGAAGAGCAAAACAAGTCCAAGAAGAAGGCCAGCAGG  
CAGCAGCTGACACAGGACACAGCAATCAGGTCAGCCAAAATTACCCTATAGTGCAGAACATCCAGGGGCAA  
ATGGTACATCAGGCCATATCACCTAGAACTTTAAATGCATGGGTAAAAGTAGTAGAAGAGAAGGCTTTTCAG  
CCCAGAAGTGATAACCATGTTTTTCAGCATTATCAGAAGGAGCCACCCACAGGACCTGAACACGATGTTGA  
ACACCGTGGGGGGACATCAAGCAGCCATGCAAATGTTAAAAGAGACCATCAATGAGGAAGCTGCAGAATG  
GGATAGAGTGCATCCAGTGCATGCAGGGCCTATTGCACCAGGCCAGATGAGAGAACCAAGGGGAAGTGAC  
ATAGCAGGAAGTACTAGTACCCTTCAGGAACAAATAGGATGGATGACAAATAATCCACCTATCCCAGTAGG  
AGAGATCTACAGGAGGTGGATAATCCTGGGATTGAACAAGATCGTGAGGATGTATAGCCCTACCAGCATT  
TGGACATAAGACAAGGACCAAAAAGAACCCTTTAGAGACTATGTAGACCGGTTCTATAAACTCTAAGAGCT  
GAGCAAGCTTCACAGGAGGTAAAAAATTGGATGACAGAAACCTGTTGGTCCAAAATGCGAACCCAGATTG  
TAAGACCATCCTGAAGGCTCTCGGCCAGCGGCTACACTAGAAGAAATGATGACAGCATGTCAGGGAGTAG  
GAGGACCCGGCCATAAGGCAAGAGTTTTGGCTGAAGCAATGAGCCAAGTAACAAATTCAGCTACCATAATG  
ATGCAGAGAGGCAATTTTAGGAACCAAGAAAGATTGTTAAGTGTTCATTGTGGCAAAGAAGGGCACAC  
AGCCAGAAATTCAGGGCCCCTAGGAAAAAGGGCTGTTGAAAATGTGAAAGGAAGGACACCAAATGAAA  
GATTGTACTGAGAGACAGGCTAATTTTTTAGGGAAGATCTGGCCTTCCTACGAGGGAAGGCCAGGGAATTT  
TCTTCAGAGCAGACCAGAGCCAACAGCCCCACCAGAAGAGAGCTTCAGGTCTGGGGTAGAGACAACAATC  
CCCCTCAGAAGCAGGAGCCGATAGACAAGGAAGTGTATCCTTTAACTTCCCTCAGATCACTCTTTGGCAGC  
GACCCCTCGTCACAAAGCGCGCAAGGAAGCCAGAAGTATCCAATCGTCCAGACCGGTGCCACCATGGACTA  
TAAGGACCACGACGAGACTACAAGGATCATGATATTGATTACAAAGACGATGACGATAAGATGGCCCAA  
AGAAGAAGCGGAAGGTTCGGTATCCACGGAGTCCCAGCAGCCGACAAGAAGTACAGCATCGGCCTGGACAT  
CGGCACCAACTCTGTGGGCTGGGCCGTGATCACCGACGAGTACAAGGTGCCAGCAAGAAATTCAGGGT  
CTGGGCAACACCGACCGGCACAGCATCAAGAAGAACCTGATCGGAGCCCTGCTGTTTCGACAGCGGCGAAA  
CAGCCGAGGCCACCCGGCTGAAGAGAACCGCCAGAAGAAGATACACCAGACGGAAGAACCGGATCTGCTA  
TCTGCAAGAGATCTTCAGCAACGAGATGGCCAAGGTGGACGACAGCTTCTCCACAGACTGGAAGAGTCT  
TCCTGGTGAAGAGGATAAGAAGCAGGAGCGGCACCCCATCTTCGGCAACATCGTGGACGAGGTGGCCTA  
CCACGAGAAGTACCCACCATCTACCACCTGAGAAAGAAACTGGTGGACAGCACCGACAAGGCCGACCTGC  
GGCTGATCTATCTGGCCCTGGCCACATGATCAAGTTCGGGGCCACTTCTGATCGAGGGCGACCTGAAC  
CCCGACAACAGCGACGTGGACAAGCTGTTTCATCCAGCTGGTGCAGACCTACAACCAGCTGTTTCGAGGAAA  
CCCCATCAACGCCAGCGGCGTGGACGCCAAGGCCATCCTGTCTGCCAGACTGAGCAAGAGCAGACGGCTG  
GAAAATCTGATCGCCAGCTGCCCGGCGAGAAGAAGTGGCCTGTTTCGAAACCTGATTGCCCTGAGCCT  
GGGCTGACCCCAACTTCAAGAGCAACTTCGACCTGGCCGAGGATGCCAACTGCAGCTGAGCAAGGACA  
CCTACGACGACGACCTGGACAACCTGCTGGCCAGATCGGCGACCAGTACGCCGACCTGTTTCTGGCCGCC  
AAGAACCTGTCCGACGCCATCCTGCTGAGCGACATCCTGAGAGTGAACACCGAGATCACCAGGCCCCCT  
GAGCGCCTCTATGATCAAGAGATACGACGAGCACCACAGGACCTGACCCTGCTGAAAGCTCTCGTGC  
AGCAGCTGCCTGAGAAGTACAAAGAGATTTTTCTTCGACCAGAGCAAGAACGGCTACGCCGGCTACATTGAC  
GGCGGAGCCAGCCAGGAAGAGTCTACAAGTTCATCAAGCCATCCTGGAAAAGATGGACGGCACCAGG  
AACTGCTCGTGAAGCTGAACAGAGAGGACCTGCTGCGGAAGCAGCGGACCTTCGACAACGGCAGCATCCC  
CCACCAGATCCACCTGGGAGAGCTGCACGCCATTCTGCGGCGGCAGGAAGATTTTTACCCATTCTGAAGG  
ACAACCGGAAAAGATCGAGAAGATCCTGACCTTCGCATCCCCTACTACGTGGGCCCTCTGGCCAGGGGA  
AACAGCAGATTCGCTGGATGACCAGAAAGAGCGAGGAAACCATCACCCCTGGAACCTCGAGGAAGTGGT  
GGACAAGGGCGCTTCGCCCCAGAGCTTCATCGAGCGGATGACCAACTTCGATAAGAACCTGCCAACGAGA  
AGGTGCTGCCAAGCACAGCCTGCTGTACGAGTACTTCACCGTGTATAACGAGCTGACCAAAGTGAAATAC  
GTGACCGAGGGAATGAGAAAGCCCGCCTTCTGAGCGGCGAGCAGAAAAAGGCCATCGTGGACCTGCTGT  
TCAAGACCAACCGAAAAGTGACCGTGAAGCAGCTGAAAGAGGACTACTTCAAGAAAATCGAGTGTTCGAC  
TCCGTGAAAATCTCCGCGGTGGAAGATCGGTTCAACGCCTCCCTGGGCACATACCACGATCTGCTGAAAAT  
TATCAAGGACAAGGACTTCTGGACAATGAGGAAAACGAGGACATTCTGGAAGATATCGTGTGACCCTGA  
CACTGTTTGAGGACAGAGAGATGATCGAGGAACGGCTGAAAACCTATGCCACCTGTTTCGACGACAAAGTG

ATGAAGCAGCTGAAGCGGCGGAGATACACCGGCTGGGGCAGGCTGAGCCGGAAGCTGATCAACGGCATCC  
GGGACAAGCAGTCCGGCAAGACAATCCTGGATTTCTGAAGTCGACGGCTTCGCCAACAGAACTTCATG  
CAGCTGATCCACGACGACAGCTGACCTTTAAAGAGGACATCCAGAAAGCCCAGGTGTCCGGCCAGGGCG  
ATAGCCTGCACGAGCACATTGCCAATCTGGCCGGCAGCCCCGCCATTAAGAAGGGCATCCTGCAGACAGTG  
AAGGTGGTGGACGAGCTCGTGAAAGTGATGGGCCGGCACAAGCCCAGAACATCGTGATCGAAATGGCCA  
GAGAGAACCAGACCACCAGAAGGGACAGAAGAACAGCCGCGAGAGAATGAAGCGGATCGAAGAGGGCAT  
CAAAGAGCTGGGCAGCCAGATCCTGAAAGAACACCCCGTGGAAAACACCCAGCTGCAGAACGAGAAGCTGT  
ACCTGTACTACCTGCAGAATGGGCGGGATATGTACGTGGACCAGGAAGTGGACATCAACCGGCTGTCCGA  
CTACGATGTGGACCATATCGTGCCTCAGAGCTTTCTGAAGGACGACTCCATCGACAACAAGGTGCTGACCA  
GAAGCGACAAGAACCAGGGCAAGAGCGACAACGTGCCCTCCGAAGAGGTCTGAAGAAGATGAAGAACTA  
CTGGCGGCAGCTGCTGAACGCCAAGCTGATTACCCAGAGAAAGTTCGACAATCTGACCAAGGCCGAGAGA  
GGCGGCCTGAGCGAACTGGATAAGGCCGGCTTCATCAAGAGACAGCTGGTGGAAACCCGGCAGATCACAA  
AGCACGTGGCACAGATCCTGGACTCCCGGATGAACTAAGTACGACGAGAATGACAAGCTGATCCGGGAA  
GTGAAAGTGATCACCTGAAGTCCAAGCTGGTGTCCGATTTCCGGAAGGATTTCCAGTTTTACAAGTGCG  
CGAGATCAACAACCTACCACCGCCACGACGCCTACCTGAACGCCGTCGTGGGAACCGCCCTGATCAAAA  
AGTACCCTAAGCTGGAAAGCGAGTTCGTGTACGGCGACTACAAGGTGTACGACGTGCGGAAGATGATCGC  
CAAGAGCGAGCAGGAAATCGGCAAGGCTACCGCCAAGTACTTCTTCTACAGCAACATCATGAACTTTTTCA  
AGACCGAGATTACCTGGCCAACGGCGAGATCCGGAAGCGGCCTCTGATCGAGACAAACGGCGAAACCGG  
GGAGATCGTGTGGGATAAAGGGCCGGGATTTTGCCACCGTGCAGAAAGTGCTGAGCATGCCCAAGTGAAT  
ATCGTGAAAAGACCGAGGTGCAGACAGGCGGCTTCAGCAAAGAGTCTATCCTGCCCAAGAGGAACAGCG  
ATAAGCTGATCGCCAGAAAGAAGGACTGGGACCCTAAGAAGTACGGCGGCTTCGACAGCCCCACCGTGGC  
CTATTCTGTGCTGGTGGTGGCCAAAGTGGAAAAGGGCAAGTCCAAGAACTGAAGAGTGTGAAAGAGCTG  
CTGGGGATCACCATCATGGAAAGAAGCAGCTTCGAGAAGAATCCCATCGACTTTCTGGAAGCCAAGGGCTA  
CAAAGAAGTGAAAAGGACCTGATCATCAAGCTGCCTAAGTACTCCCTGTTTCGAGCTGGAAAACGGCCGGA  
AGAGAATGCTGGCCTCTGCCGGCGAACTGCAGAAGGGAAACGAACTGGCCCTGCCCTCCAAATATGTGAAC  
TTCCTGTACCTGGCCAGCCACTATGAGAAGCTGAAGGGCTCCCCGAGGATAATGAGCAGAAACAGCTGTT  
TGTGGAACAGCACAAAGCACTACCTGGACGAGATCATCGAGCAGATCAGCGAGTTCTCCAAGAGAGTGATCC  
TGGCCGACGCTAATCTGGACAAAGTGCTGTCCGCCTACAACAAGCACCCGGGATAAGCCCATCAGAGAGCAG  
GCCGAGAATATCATCCACCTGTTTACCCTGACCAATCTGGGAGCCCCTGCCGCTTCAAGTACTTTGACAC  
CACCATCGACCGGAAGAGGTACACCAGCACCAAAGAGGTGCTGGACGCCACCCTGATCCACCAGAGCATCA  
CCGGCCTGTACGAGACACGGATCGACCTGTCTCAGCTGGGAGGCGACAAAAGGCCGGCGGCCACGAAAAA  
GGCCGGCCAGGCCAAAAAGAAAAAGTAA

Gag, linker, 3X-FLAG, SV40 NLS, SpCas9, nucleoplasmin NLS

**pX-Gag-SpCas9 sequence.** Coding sequence of Gag-SpCas9. The internal linker methionine, which mutated to alanine, was identified as responsible of free SpCas9 production is labelled in bold and underlined.

## pCDNA3 MinimalGag-SpCas9 sequence

ATGGGTGCGAGAGCGTCAGTATCTAGTCTACCAGCATTCTGGACATAAGACAAGGACCAAAAG  
AACCCTTTAGAGACTATGTAGACCGGTTCTATAAACTCTAAGAGCCGAGCAAGCTTCACAGGA  
GGTAAAAAATTGGATGACAGAAACCTTGTGGTCCAAAATGCGAACCCAGATTGTAAGACTATT  
TTAAAAGCATTGGGACCAGCGGCTACACTAGAAGAAATGATGACAGCATGTCAGGGAGTAGGA  
GGACCCGGCCATAAGGCAAGAGTTTTGGCTGAAGCAATGAGCCAAGTAACAAATTCAGCTACCA  
TAATGCTGCAGCGTATGAAGCAGCTCGAGGATAAAGTGAAGAAGCTCTTAAGCAAAACTACCA  
CCTGGAAAACGAAGTGGCACGTCTGAAAAGCTTGTGGGTGAGACAGCATCCGCTCCTCCTCC  
CCGTACGTAGGCCTGGCGGATCCGGCGGGTCCGGTGCCACCATGGACTATAAGGACCACGACGGAGAC  
TACAAGGATCATGATATTGATTACAAAGACGATGACGATAAGATGGCCCCAAGAAGAAGCGGAAGTCCG  
TATCCACGGAGTCCCAGCAGCCGACAAGAAGTACAGCATCGGCCTGGACATCGGCACCAACTCTGTGGGCT  
GGGCCGTGATCACCGACGAGTACAAGGTGCCAGCAAGAAATCAAGGTGCTGGGCAACACCGACCGGCA  
CAGCATCAAGAAGAACCTGATCGGAGCCCTGCTGTTGACAGCGGCGAAACAGCCGAGGCCACCCGGCTG  
AAGAGAACC GCCAGAAGAAGATACACCAGACGGAAGAACCGGATCTGCTATCTGCAAGAGATCTTCAGCAA  
CGAGATGGCCAAGGTGGACGACAGCTTCTCCACAGACTGGAAGAGTCTTCCTGGTGAAGAGGATAAG  
AAGCACGAGCGGCACCCCATCTTCGGCAACATCGTGGACGAGGTGGCCTACCACGAGAAGTACCCACCAT  
CTACCACCTGAGAAAAGAACTGGTGGACAGCACCCGACAAGGCCGACCTGCGGCTGATCTATCTGGCCCTGG  
CCCACATGATCAAGTTCGGGGGCCACTTCTGATCGAGGGCGACCTGAACCCCGACAACAGCGACGTGGAC  
AAGCTGTTTCATCCAGCTGGTGCAGACCTACAACAGCTGTTGAGGAAAACCCCATCAACGCCAGCGGCGT  
GGACGCCAAGGCCATCCTGTCTGCCAGACTGAGCAAGAGCAGACGGCTGGAAAATCTGATCGCCAGCTG  
CCCGGCGAGAAGAAGAATGGCCTGTTGGAACCTGATTGCCCTGAGCCTGGGCTGACCCCCAACTTCAA  
GAGCAACTTCGACCTGGCCGAGGATGCCAACTGCAGCTGAGCAAGGACACCTACGACGACGACCTGGAC  
AACCTGCTGGCCAGATCGGCGACCAGTACGCCGACCTGTTTCTGGCCGCAAGAACCTGTCCGACGCCAT  
CCTGCTGAGCGACATCCTGAGAGTGAACACCGAGATCACCAAGGCCCCCTGAGCGCCTCTATGATCAAGA  
GATACGACGAGCACACCAGGACCTGACCCTGCTGAAAGCTCTCGTGCGGCAGCAGCTGCCTGAGAAGTAC  
AAAGAGATTTTCTTCGACCAGAGCAAGAACGGCTACGCCGGCTACATTGACGGCGGAGCCAGCCAGGAAG  
AGTTCTACAAGTTCATCAAGCCATCCTGGAAAAGATGGACGGCACCGAGGAAGTCTCGTGAAGCTGAAC  
AGAGAGGACCTGCTGCGGAAGCAGCGGACCTTCGACAACGGCAGCATCCCCACCAGATCCACCTGGGAG  
AGCTGCACGCCATTCTGCGGCGGCAGGAAGATTTTACCCATTCTGAAGGACAACCGGAAAAGATCGAG  
AAGATCCTGACCTCCGCATCCCCTACTACGTGGGCCCTCTGGCCAGGGGAAACAGCAGATTCGCCTGGAT  
GACCAGAAAGAGCGAGGAAACCATCACCCCTGGAACCTTCGAGGAAGTGGTGGACAAGGGCGCTTCCGCC  
CAGAGCTTCATCGAGCGGATGACCAACTTCGATAAGAACCTGCCAACGAGAAGGTGCTGCCAAGCACAG  
CCTGCTGTACGAGTACTTCACCGTGTATAACGAGCTGACCAAAGTGAATACGTGACCGAGGGAATGAGAA  
AGCCCGCTTCTGAGCGGCGAGCAGAAAAAGGCCATCGTGGACCTGCTGTTCAAGACCAACCGGAAAGT  
GACCGTGAAGCAGCTGAAAGAGGACTACTTCAAGAAAATCGAGTGCTTCGACTCCGTGGAAATCTCCGGCG  
TGGAAGATCGGTTCAACGCTCCCTGGGCACATACCACGATCTGCTGAAAATTATCAAGGACAAGGACTTC  
CTGGACAATGAGGAAAACGAGGACATTCTGGAAGATATCGTGCTGACCCTGACACTGTTTGGAGACAGAGA  
GATGATCGAGGAACGGCTGAAAACCTATGCCACCTGTTGACGACAAAAGTATGAAGCAGCTGAAGCGG  
CGGAGATACACCGGCTGGGGCAGGCTGAGCCGGAAGCTGATCAACGGCATCCGGGACAAGCAGTCCGGCA  
AGACAATCCTGGATTTCTGAAGTCCGACGGCTTCGCCAACAGAAAATTCATGCAGCTGATCCACGACGAC  
AGCCTGACCTTTAAAGAGGACATCCAGAAAAGCCAGGTGTCCGGCCAGGGCGATAGCCTGCACGAGCACAT  
TGCCAATCTGGCCGCGACCCCCGCCATTAAGAAGGGCATCCTGCAGACAGTGAAGGTGGTGGACGAGCTC  
GTGAAAGTATGATGGGCCGCGACAAGCCCCGAGAACATCGTGATCGAAATGGCCAGAGAGAACCAGACCACC  
AGAAGGGACAGAAGAACAGCCGCGAGAGAATGAAGCGGATCGAAGAGGGCATCAAAGAGCTGGGCAGCCA  
GATCCTGAAAGAACACCCCGTGGAAAACACCCAGCTGCAGAACGAGAAGCTGTACCTGTACTACCTGCAGA  
ATGGGCGGGATATGTACGTGGACCAGGAACTGGACATCAACCGGCTGTCCGACTACGATGTGGACCATAT  
CGTGCCCTCAGAGCTTTCTGAAGGACGACTCCATCGACAACAAGGTGCTGACCAGAAGCGACAAGAACC  
GGGCAAGAGCGACAACGTGCCCTCCGAAGAGGTGCTGAAGAAGATGAAGAAGTACTGGCGGCAGCTGCTGAA  
CGCCAAGCTGATTACCCAGAGAAAGTTCGACAATCTGACCAAGGCCGAGAGAGGGCGGCTGAGCGAACTG  
GATAAGGCCGGCTTCATCAAGAGACAGCTGGTGGAAACCCGGCAGATCACAAAGCACGTGGCACAGATCCT  
GGACTCCCGGATGAACACTAAGTACGACGAGAATGACAAGCTGATCCGGGAAGTGAAGTATCACCCCTGA  
AGTCCAAGCTGGTGTCCGATTTCCGAAGGATTTCCAGTTTTACAAAGTGCGCGAGATCAACAACCTACCAC

CACGCCACGACGCCTACCTGAACGCCGTCGTGGGAACCGCCCTGATCAAAAAGTACCCTAAGCTGGAAAG  
CGAGTTCGTGTACGGCGACTACAAGGTGTACGACGTGCGGAAGATGATCGCCAAGAGCGAGCAGGAAATC  
GGCAAGGCTACCGCCAAGTACTTCTTCTACAGCAACATCATGAACTTTTTCAAGACCGAGATTACCCTGGC  
CAACGGCGAGATCCGGAAGCGGCCTCTGATCGAGACAAACGGCGAAACCGGGGAGATCGTGTGGGATAAG  
GGCCGGGATTTTGCCACCGTGCGGAAAGTGCTGAGCATGCCCAAGTGAATATCGTGAAAAAGACCGAGG  
TGCAGACAGGCGGCTTCAGCAAAGAGTCTATCCTGCCAAGAGGAACAGCGATAAGCTGATCGCCAGAAAG  
AAGGACTGGGACCCTAAGAAGTACGGCGGCTTCGACAGCCCCACCGTGGCCTATTCTGTGCTGGTGGTGG  
CCAAAGTGGAAAAGGGCAAGTCCAAGAAACTGAAGAGTGTGAAAGAGCTGCTGGGGATCACCATCATGGA  
AAGAAGCAGCTTCGAGAAGAATCCCATCGACTTTCTGGAAGCCAAGGGCTACAAAGAAGTAAAAAGGACC  
TGATCATCAAGCTGCCTAAGTACTCCCTGTTTCGAGCTGGAAAACGGCCGGAAGAGAATGCTGGCCTCTGCC  
GGCGAACTGCAGAAGGGAAACGAACTGGCCCTGCCCTCCAAATATGTGAACTTCTGTACCTGGCCAGCCA  
CTATGAGAAGCTGAAGGGCTCCCCGAGGATAATGAGCAGAAACAGCTGTTTGTGGAACAGCACAAAGCACT  
ACCTGGACGAGATCATCGAGCAGATCAGCGAGTTCTCCAAGAGAGTGATCCTGGCCGACGCTAATCTGGAC  
AAAGTGCTGTCCGCCTACAACAAGCACCGGGATAAGCCCATCAGAGAGCAGGCCGAGAATATCATCCACCT  
GTTTACCCTGACCAATCTGGGAGCCCCTGCCGCCTTCAAGTACTTTGACACCACCATCGACCGGAAGAGGT  
ACACCAGCACCAAGAGGTGCTGGACGCCACCCTGATCCACCAGAGCATCACCGGCCTGTACGAGACACGG  
ATCGACCTGTCTCAGCTGGGAGGCGACAAAAGGCCGGCGGCCACGAAAAAGGCCGGCCAGGCCAAAAAGA  
AAAAGTAA

Gag-derived domains, Gcn4, RSV-p2b, linker, 3X-FLAG, SV40 NLS, SpCas9, nucleoplasmin NLS.

**pCDNA3 MinimalGag-SpCas9 sequence.** Minimal-Gag coding sequence is labelled in bold. The internal linker methionine, which mutated to alanine, was identified as responsible of free SpCas9 production is underlined.



**Table S1.** Sequences of oligonucleotides used to construct pVAX-T7-sgRNA expression plasmids and sequences of relative target sites

| <b>sgRNA</b>                 | <b>oligo 1 (*)</b>              | <b>oligo2 (*)</b>                 | <b>target site (**)</b>                                           |
|------------------------------|---------------------------------|-----------------------------------|-------------------------------------------------------------------|
| <i>EGFP5</i>                 | tataGGAAGTTCGAGGG<br>CGACACCC   | aaacGGGTGTCGCCCTC<br>GAACTTCCCC   | ggtGAAGTTCGAGGGCGACACCCTG<br><b>Gtga</b>                          |
| <i>EGFPBi</i>                | tataGGGCACGGGCAG<br>CTTGCCGG    | aaacCCGGCAAGCTGCC<br>CGTGCCCCC    | ccaCCGGCAAGCTGCCCCGTGCCCTG<br><b>Gccc</b>                         |
| <i>EGFP3g</i><br><i>W</i>    | tataGGGCTCGTGACCA<br>CCCTGACCTA | aaacTAGGTCAGGGTGG<br>TCACGAGCCCCC | accCTCGTGACCACCCTGACCTA <b>CGG</b><br>cgt                         |
| <i>GFPI2</i>                 | tataGGTGGGCACCGG<br>CTTCCCCG    | aaacCGGGGAAGCCGGT<br>GCCACCCCC    | ggtGGTGGGCACCGGCTTCCCC <b>GAG</b><br><b>Gaca</b>                  |
| <i>VEGFA</i><br><i>site3</i> | tataGGTGAGTGAGTGT<br>GTGCGTG    | aaacCACGCACACACTCA<br>CTCACC      | gtgGGTGAGTGAGTGTGTGCGT <b>GTG</b><br><b>Gggt</b>                  |
| <i>VEGFA</i><br>OT1          | --                              | --                                | gtg <b>A</b> GTGAGTGAGTGTGT <b>G</b> GT <b>GGG</b><br><b>Gggg</b> |
| <i>VEGFA</i><br>OT3          | --                              | --                                | atg <b>T</b> GT <b>G</b> GTGAGTGTGTGCGT <b>GAG</b><br><b>Gaca</b> |
| <i>CXCR4</i>                 | tataGGAAGCGTGATGA<br>CAAAGAGG   | aaacCCTCTTTGTCATCA<br>CGCTTCCCC   | aagGGAAGCGTGATGACAAAG <b>AGG</b> a<br>gg                          |

(\*) Lowercase indicates sticky ends used for cloning into pVAX-T7-sgRNA plasmid.

(\*\*) Mismatches are highlighted in red, PAM is in bold. Context sequence around target site are in lowercase.

**Table S2.** Sequences of the oligonucleotides used for PCR amplifications.

| <b>oligo</b>               | <b>sequence</b>                    |
|----------------------------|------------------------------------|
| T7 fw - HindIII            | ACTAAGCTTGTGACCATGAACACGATTAACATCG |
| T7 rev - XbaI              | TAATCTAGATTACGCGAACGCGAAGTC        |
| T7 promoter fw             | GAAATTAATACGACTCACTATAGG           |
| gRNA end rev               | AAGCACCGACTCGGTGCCA                |
| <i>EGFP</i> fw             | ACCATGGTGAGCAAGGGCGAGGA            |
| <i>EGFP</i> rev            | AGCTCGTCCATGCCGAGAGTGATC           |
| <i>VEGFA site3</i> ON fw   | GCATACGTGGGCTCCAACAGGT             |
| <i>VEGFA site3</i> ON rev  | CCGCAATGAAGGGGAAGCTCGA             |
| <i>VEGFA site3</i> OT1 fw  | CAGGCGCCTTGGGCTCCGTCA              |
| <i>VEGFA site3</i> OT1 rev | CCCCAGGATCCGCGGGTCAC               |
| <i>VEGFA site3</i> OT3 fw  | AGTCAGCCCTCTGTATCCCTGGA            |
| <i>VEGFA site3</i> OT3 rev | GAGATATCTGCACCCTCATGTTCAC          |
| <i>CXCR4</i> fw            | AGAGGAGTTAGCCAAGATGTGACTTTGAAACC   |
| <i>CXCR4</i> rev           | GGACAGGATGACAATACCAGGCAGGATAAGGCC  |
